# Supplementary material for: Design and synthesis of novel 2-(2-(4-bromophenyl)quinolin-4-yl)-1,3,4-oxadiazole derivatives as anticancer and antimicrobial candidates: in vitro and in silico studies
Source: Royal Society of Chemistry journal article supplement (doi:10.1039/d4ra06712f), 2024-01-01
Supplement: d4ra06712f1.pdf [file d4ra06712f1.pdf]

**Design and Synthesis of Novel 2-(2-(4-bromophenyl)quinolin-4-yl)-1,3,4-oxadiazole Derivatives as Anticancer and Antimicrobial candidates: *In vitro* and *In silico* studies**

Noha Ryad <sup>1</sup>, Ayman Abo Elmaaty <sup>2</sup>, Samy Selim <sup>3,\*</sup>, Mohammed S. Almuhayawi <sup>4</sup>, Soad K. Al Jaouni <sup>5</sup>, Mohamed S. Abdel-Aziz <sup>6</sup>, Arwa Sultan Alqahtani <sup>7</sup>, Islam Zaki <sup>8,\*</sup> and Lina M. A. Abdel Ghany <sup>9</sup>

<sup>1</sup> *Pharmaceutical Organic Chemistry Department, College of Pharmaceutical Sciences and Drug Manufacturing, Misr University for Science and Technology, 6th of October City, Giza, P.O. Box 77, Egypt;* <sup>2</sup> *Medicinal Chemistry Department, Faculty of Pharmacy, Port Said University, Port Said 42526, Egypt;* <sup>3</sup> *Department of Clinical Laboratory Sciences, College of Applied Medical Sciences, Jouf University, Sakaka 72388, Saudi Arabia;* <sup>4</sup> *Department of Clinical Microbiology and Immunology, Faculty of Medicine, King Abdulaziz University, Jeddah 21589, Saudi Arabia;* <sup>5</sup> *Department of Hematology/Oncology, Yousef Abdulatif Jameel Scientific Chair of Prophetic Medicine Application, Faculty of Medicine, King Abdulaziz University, Jeddah 21589, Saudi Arabia;* <sup>6</sup> *Microbial Chemistry Department, Biotechnology Research Institute, National Research Centre, Cairo, Egypt;* <sup>7</sup> *Department of Chemistry, College of Science, Imam Mohammad Ibn Saud Islamic University(IMSUI), P.O. Box, 90950, Riyadh 11623, Saudi Arabia;* <sup>8</sup> *Pharmaceutical Organic Chemistry Department, Faculty of pharmacy, Port Said University, Port Said, Egypt;* <sup>9</sup> *Pharmaceutical Organic Chemistry Department, College of Pharmaceutical Sciences and Drug Manufacturing, Misr University for Science and Technology, 6th of October City, Giza, P.O. Box 77, Egypt*

---

**\* To whom correspondence should be addressed**

1. Islam Zaki, PhD. Pharmaceutical Organic Chemistry Department, Faculty of pharmacy, Port Said University, Port Said, Egypt

**E-mail address:** [eslam.zaki@pharm.psu.edu.eg](mailto:eslam.zaki@pharm.psu.edu.eg) (Zaki, I.)

2. Samy Selim, Department of Clinical Laboratory Sciences, College of Applied Medical Sciences, Jouf University, Sakaka 72388, Saudi Arabia

**E-mail address:** [sabdulsalam@ju.edu.sa](mailto:sabdulsalam@ju.edu.sa) (Selim, S.)

## Appendix A

### Part 1: Spectral data:

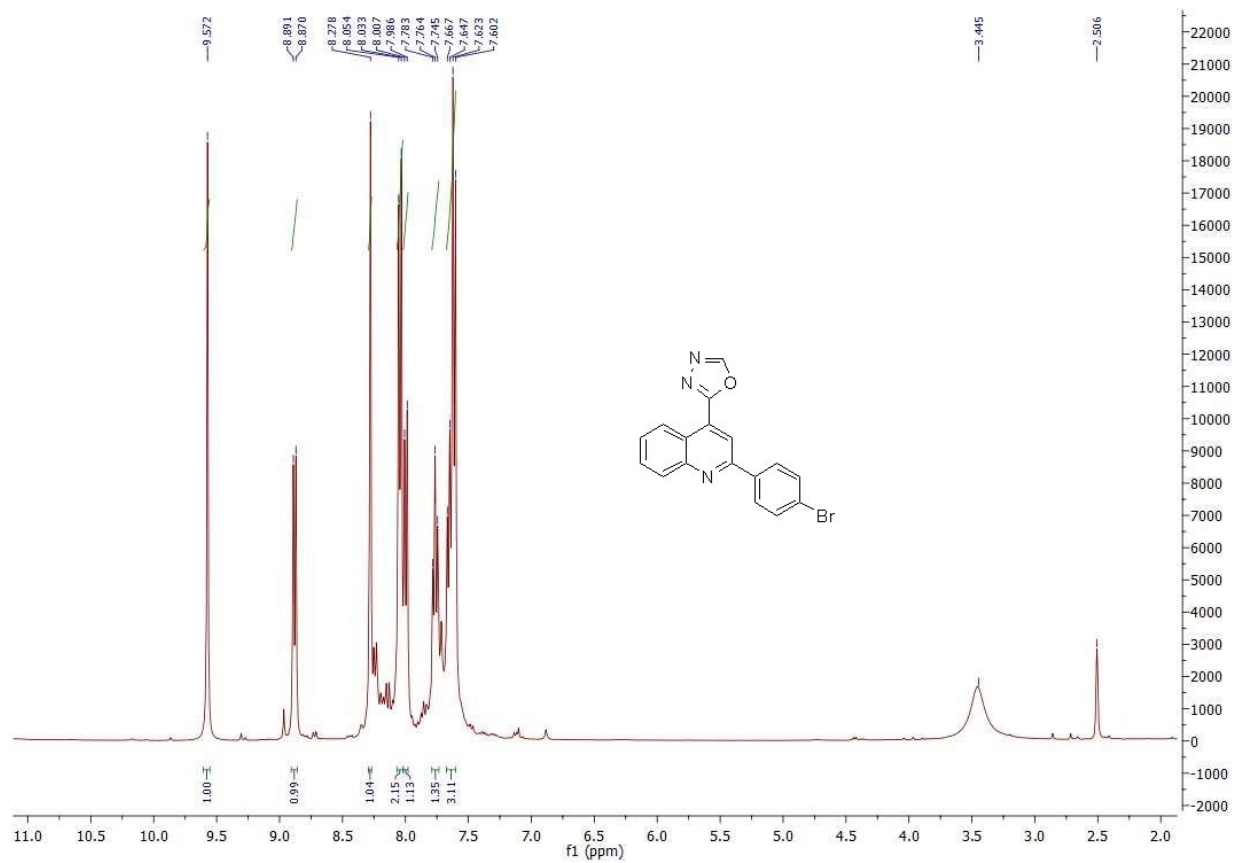

Figure S1:  $^1\text{H}$ NMR spectrum of the compound 7.

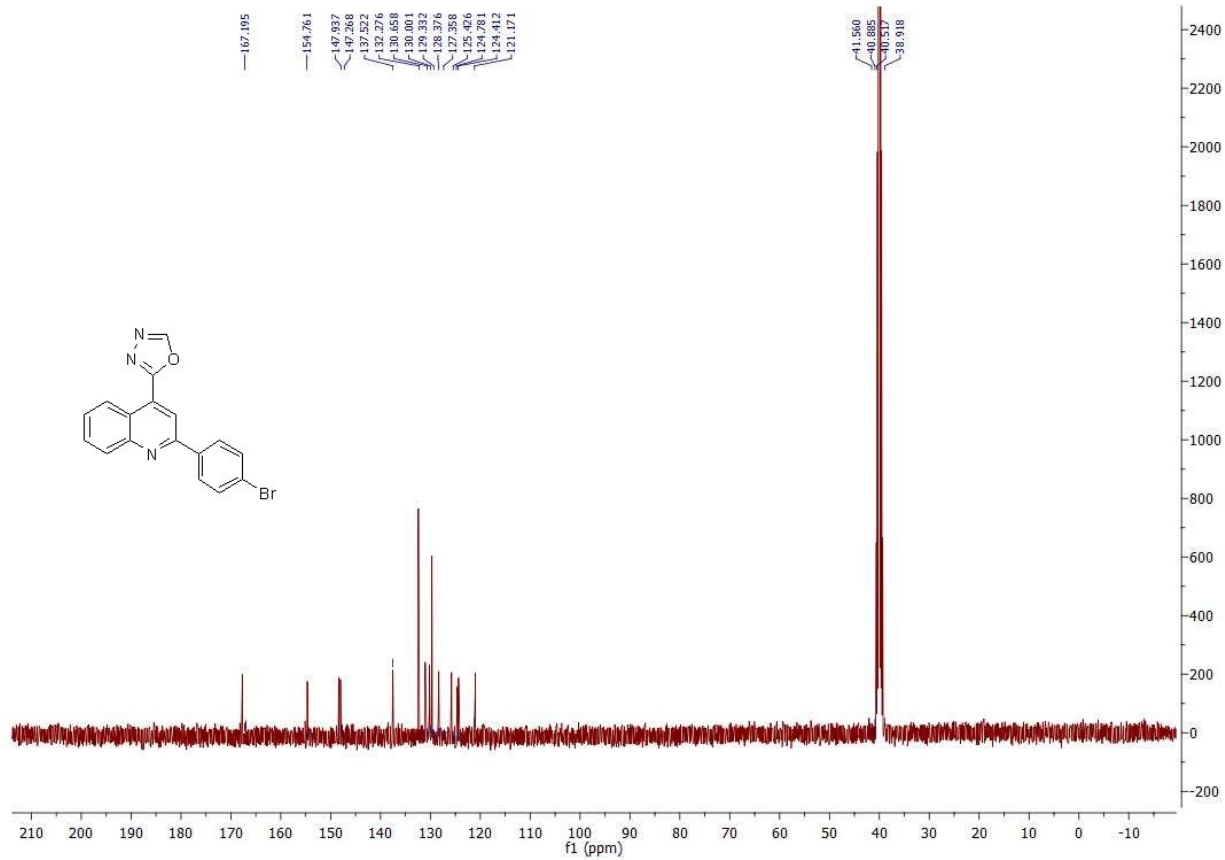

Figure S2:  $^{13}\text{C}$ NMR spectrum of the compound 7.

-7 #145-149 RT: 2.44-2.51 AV: 5 SB: 26 1.21-1.34, 0.87-1.14 NL: 1.12E2  
T: + cEI Full ms [40.00-1000.00]

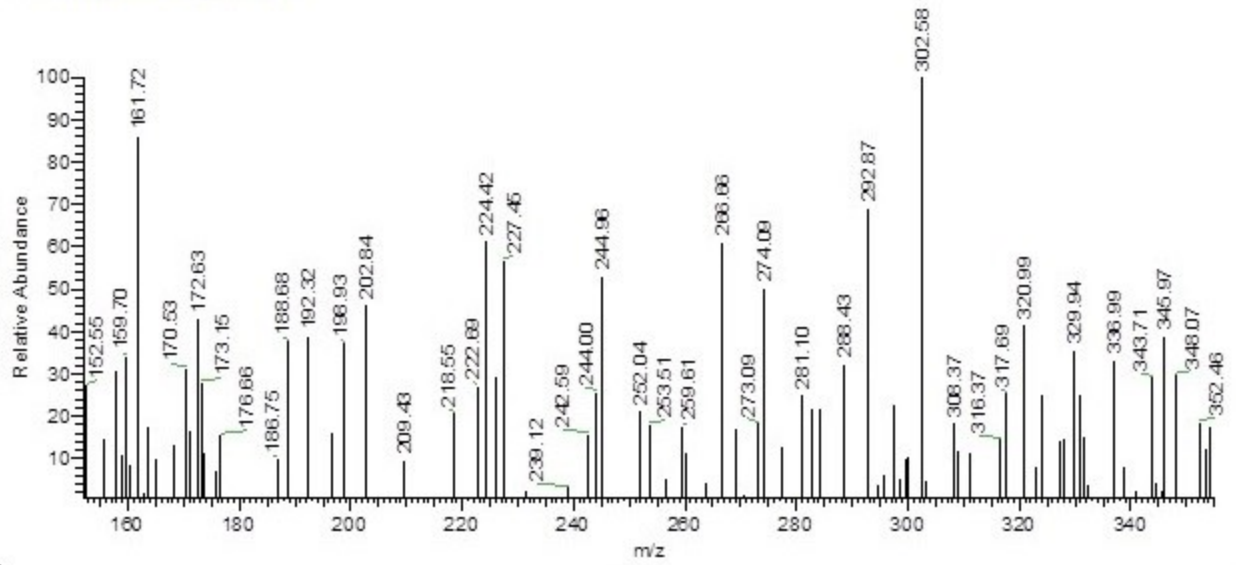

Figure S3: MS of the compound 7.

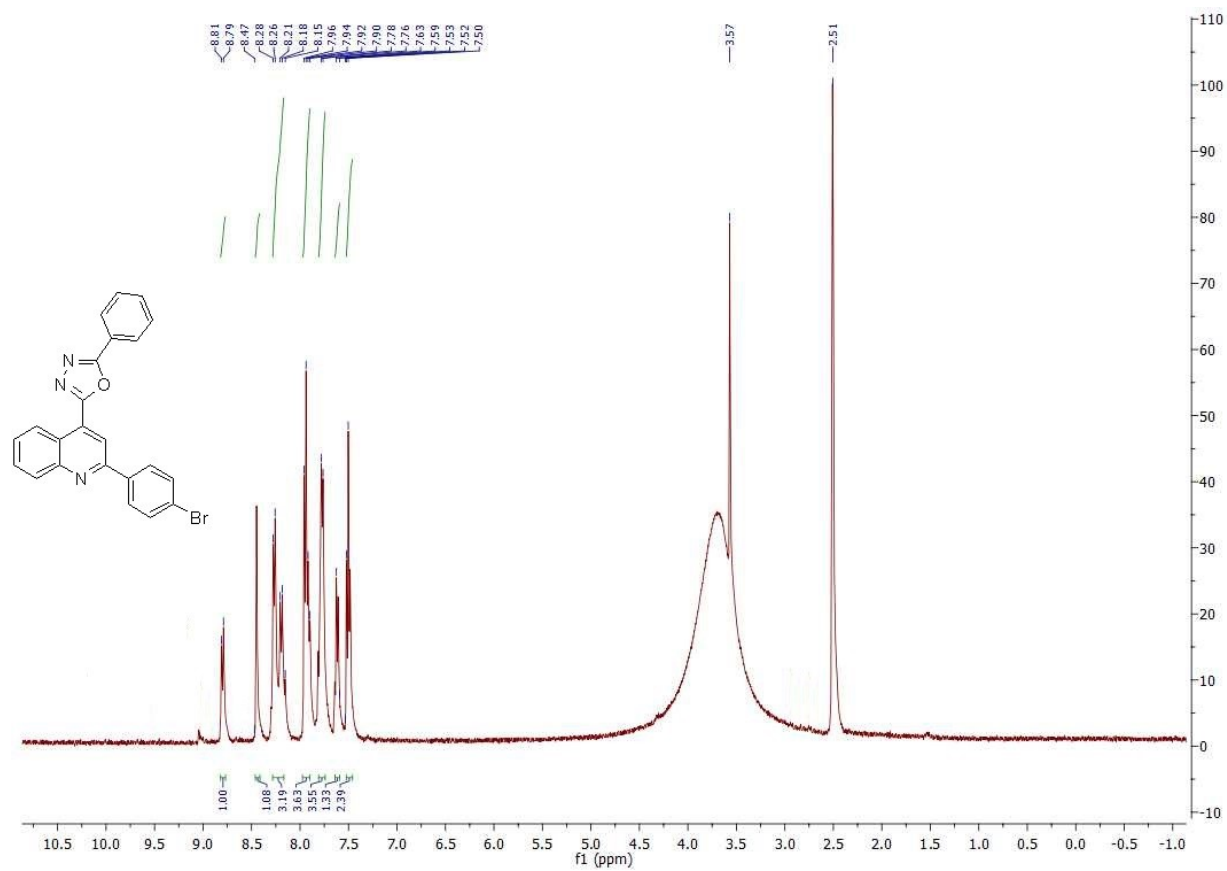

**Figure S4:**  $^1\text{H NMR}$  spectrum of the compound **8a**.

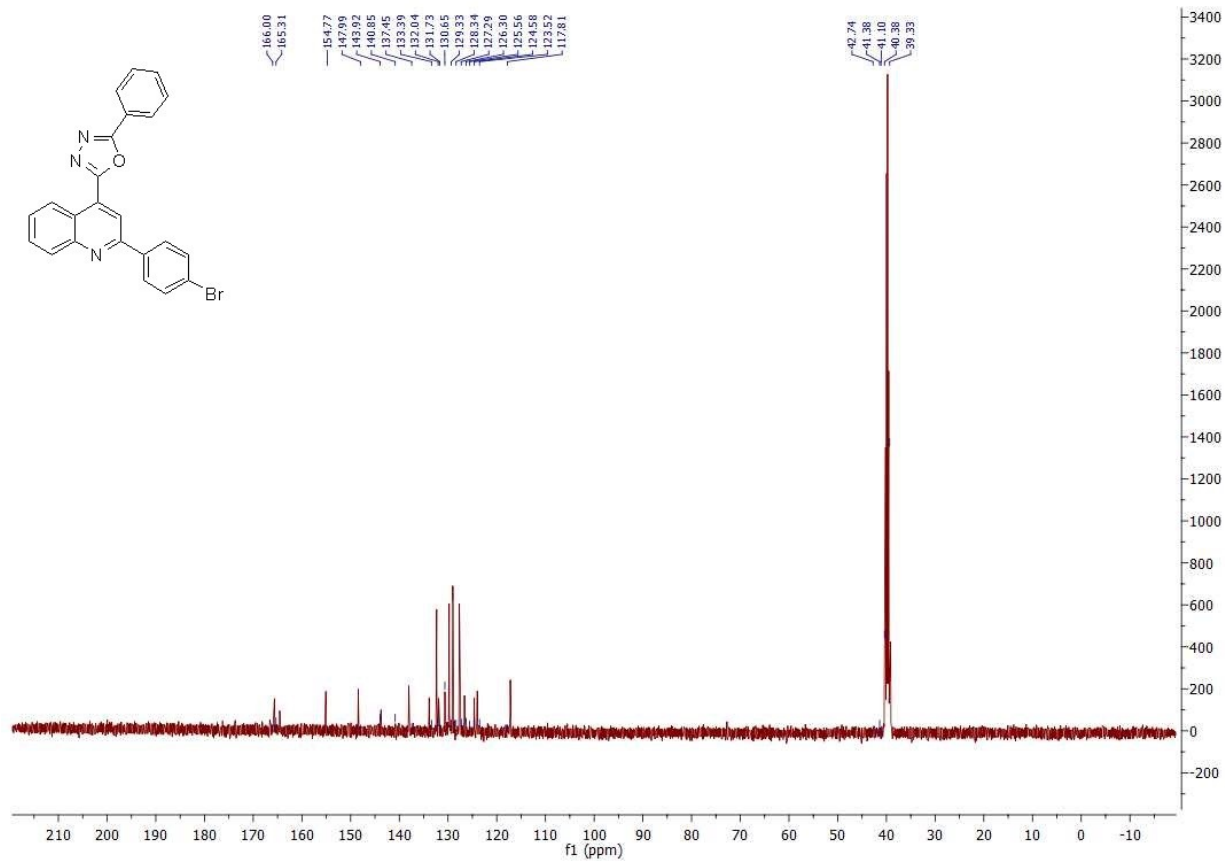

Figure S5:  $^{13}\text{C}$ NMR spectrum of the compound 8a.

-8a #257-260 RT: 4.32-4.37 AV: 4 SB: 26 1.21-1.34, 0.87-1.14 NL: 1.06E2  
T: + cEI Full ms [40.00-1000.00]

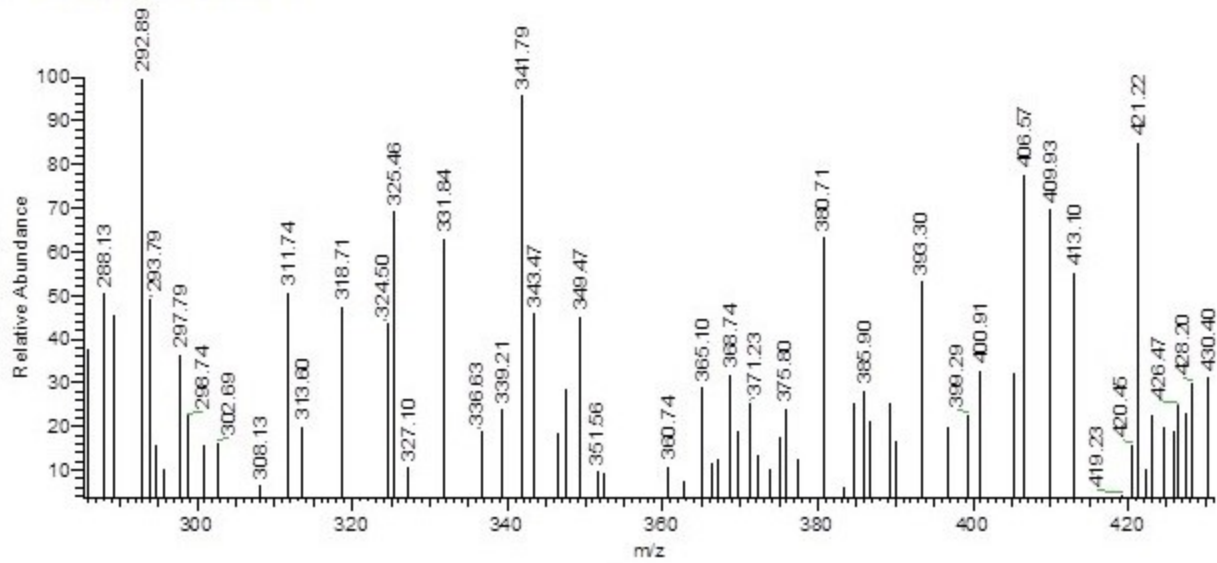

Figure S6: MS of the compound 8a.

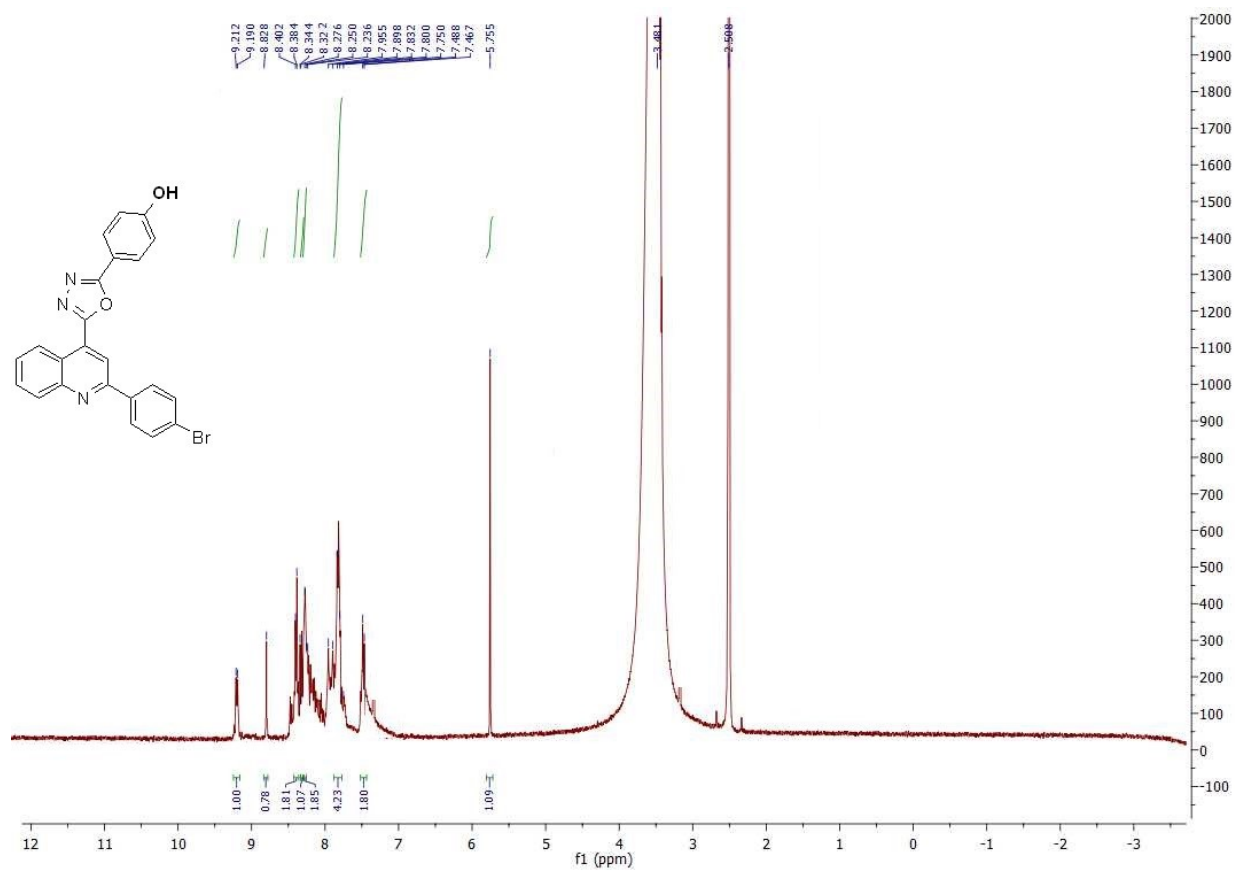

**Figure S7:** <sup>1</sup>H NMR spectrum of the compound **8b**.



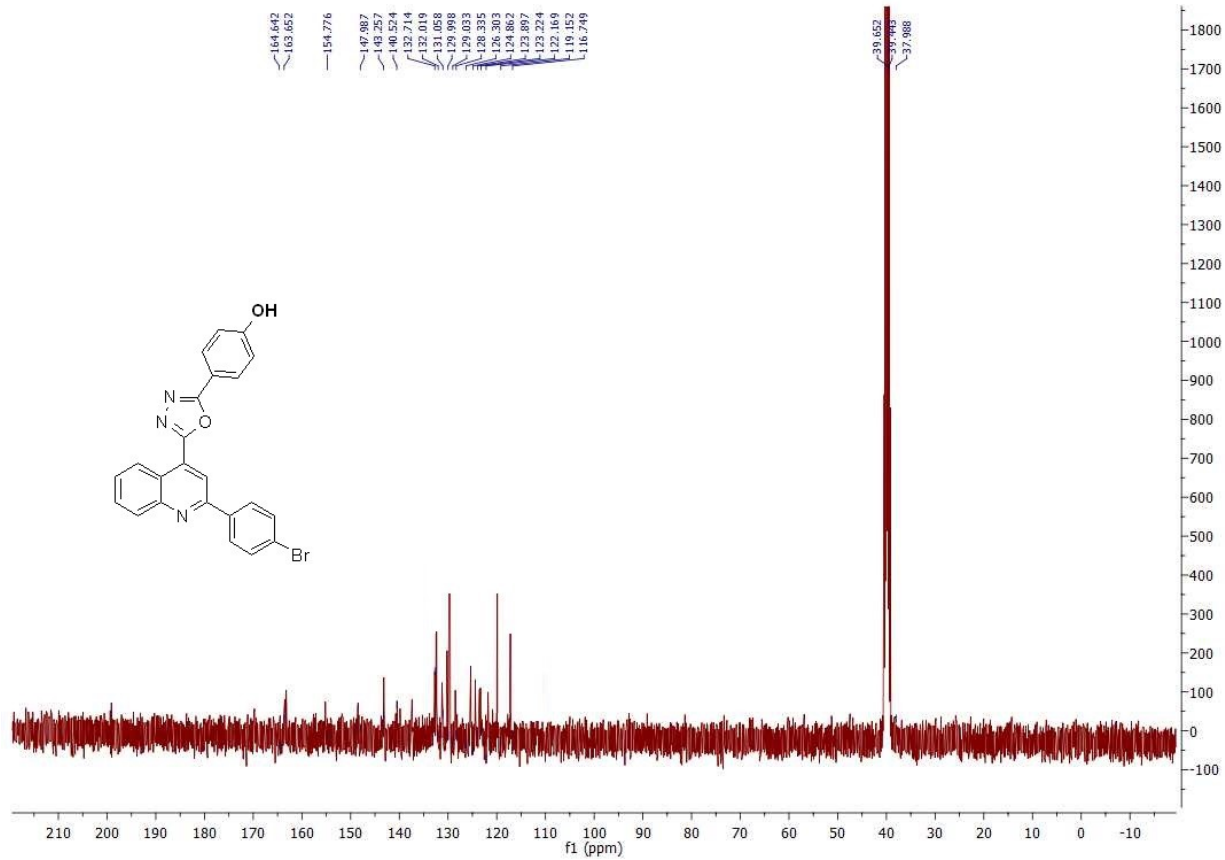

**Figure S8:**  $^{13}\text{C}$ NMR spectrum of the compound **8b**.

8b #256-259 RT: 4.30-4.35 AV: 4 SB: 26 1.21-1.34 , 0.87-1.14 NL: 9.33E1  
T: + cEI Full ms [40.00-1000.00]

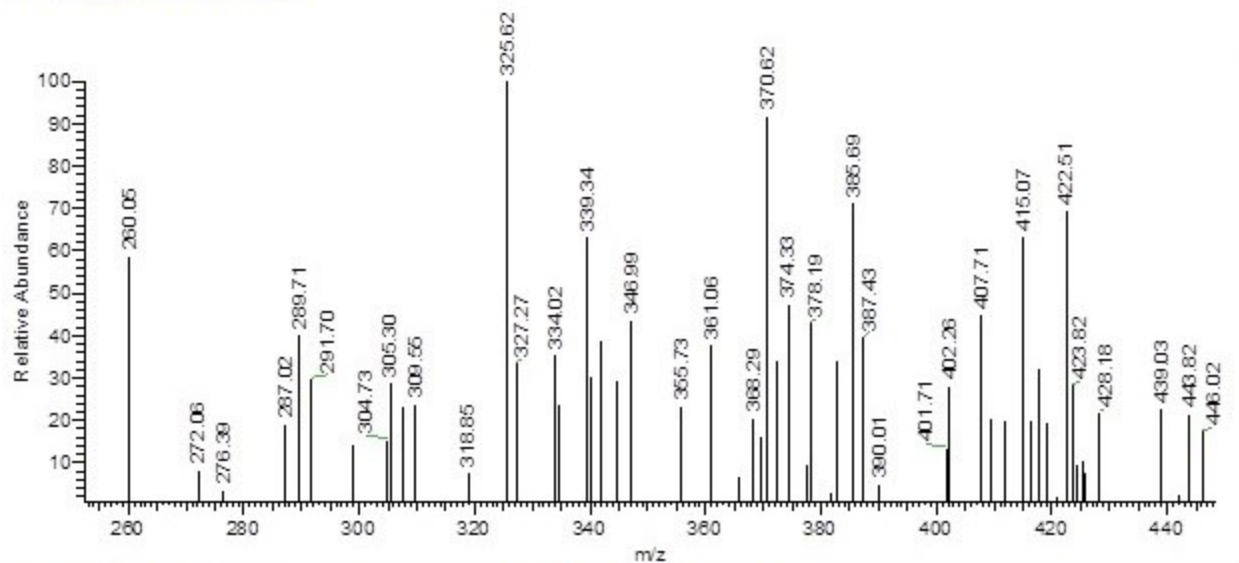

Figure S9: MS of the compound 8b.

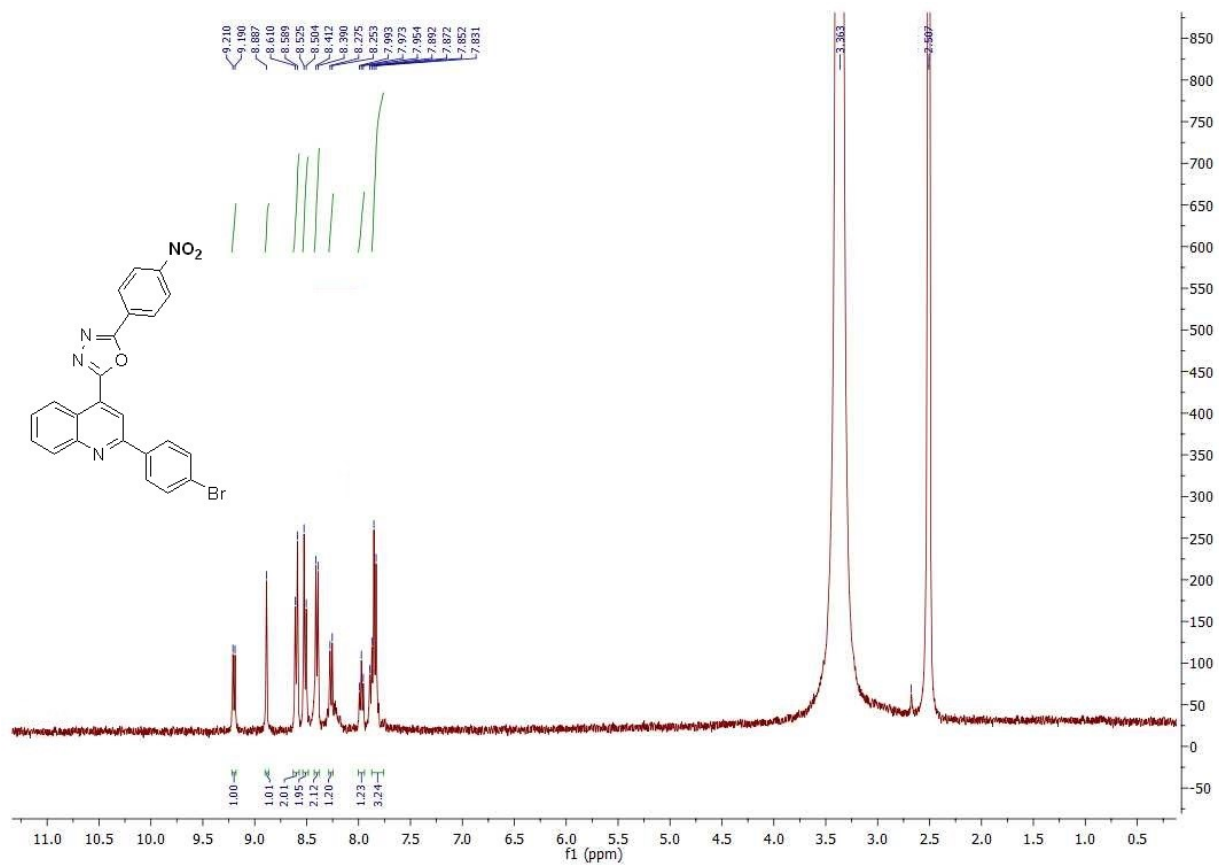

Figure S10: <sup>1</sup>H NMR spectrum of the compound 8c.

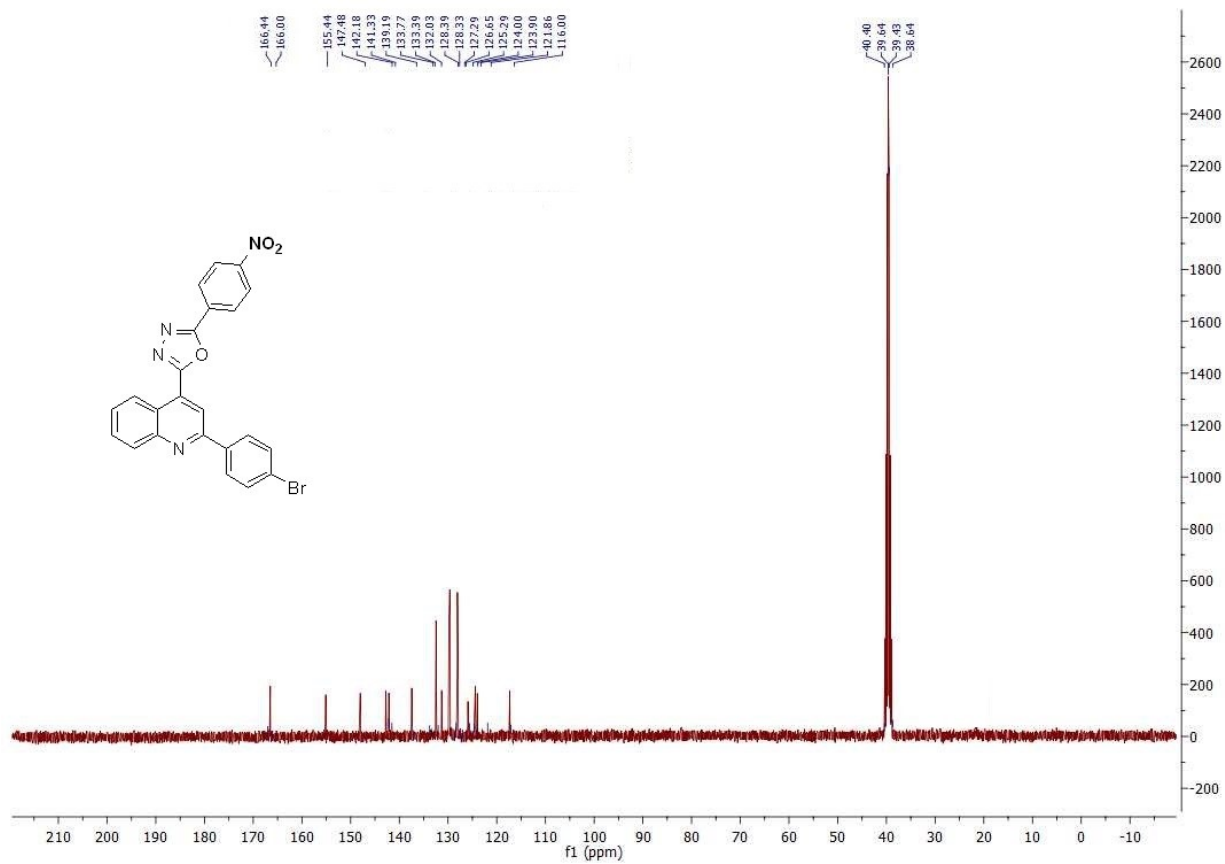

**Figure S11:** <sup>13</sup>CNMR spectrum of the compound **8c**.

-8C #275-277 RT: 4.62-4.65 AV: 3 SB: 26 1.21-1.34, 0.87-1.14 NL: 5.71E1  
: + cEI Full ms [40.00-1000.00]

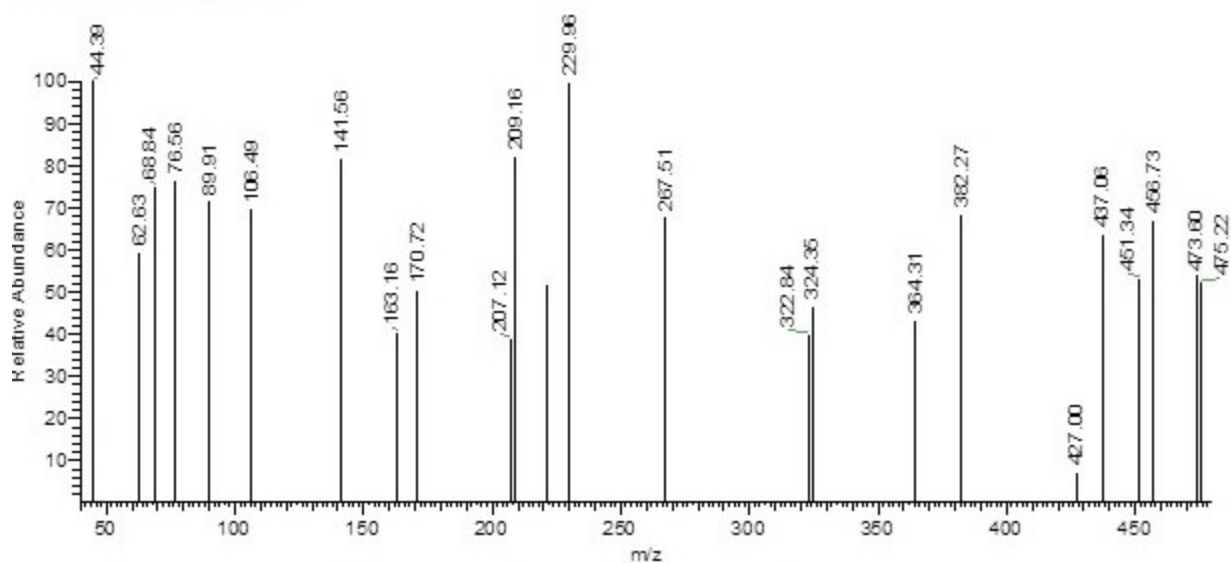

**Figure S12:** MS of the compound **8c**.

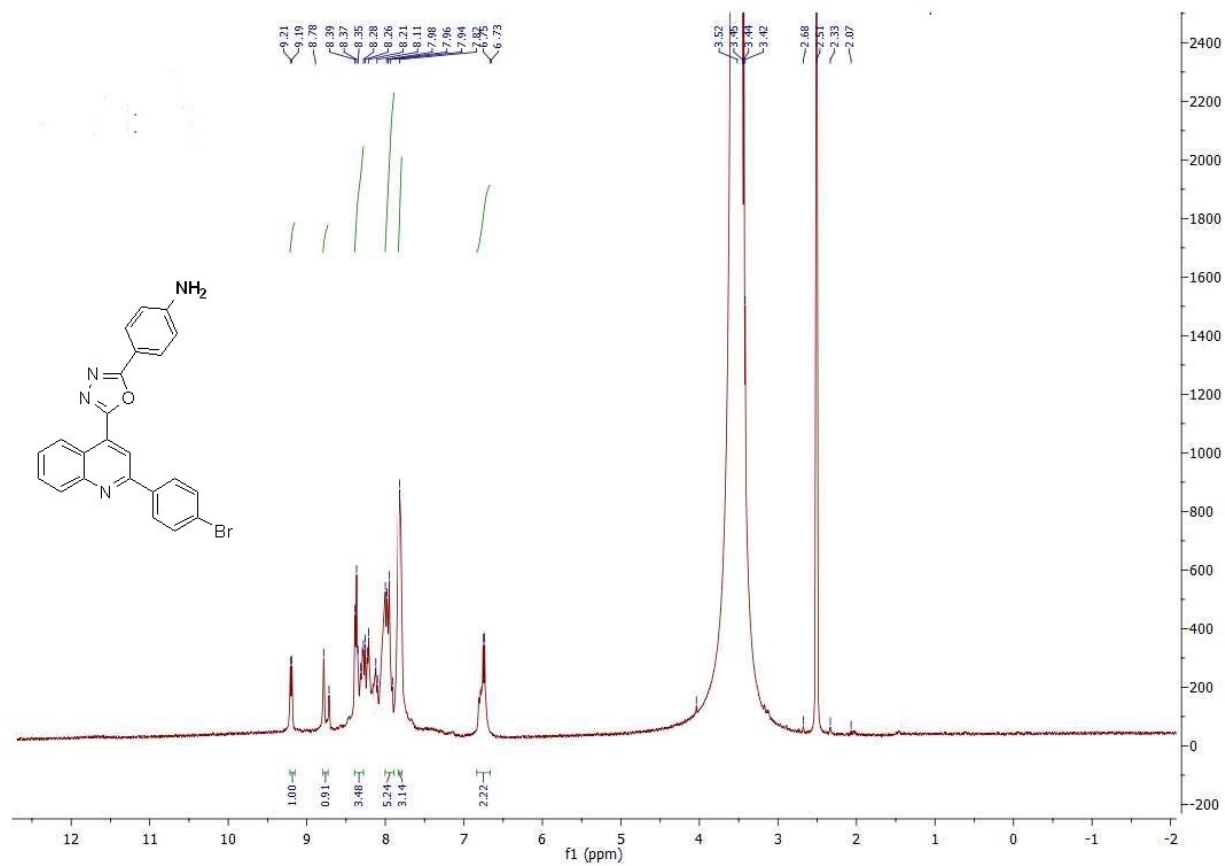

**Figure S13:**  $^1\text{H}$ NMR spectrum of the compounds **8d**.

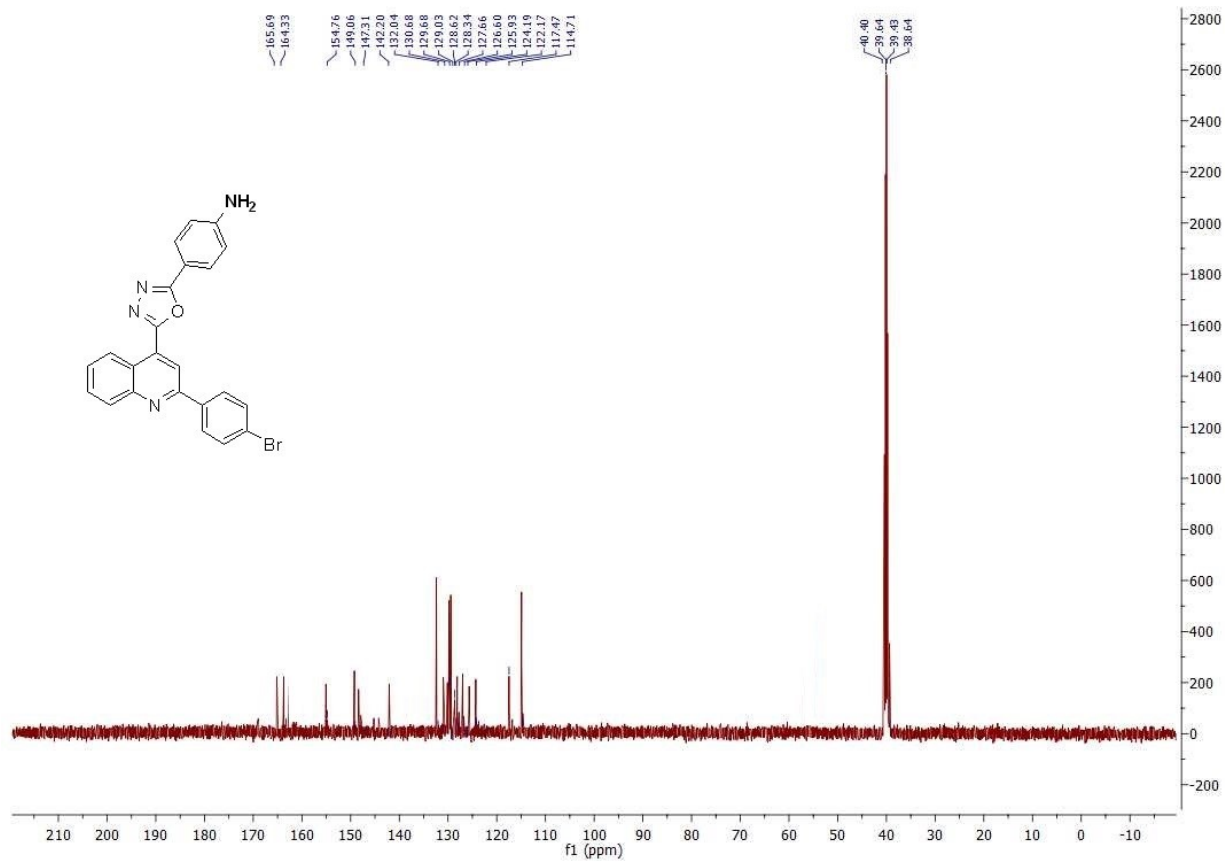

**Figure S14:**  $^{13}\text{C}$ NMR spectrum of the compound **8d**.

8d #221-224 RT: 3.72-3.77 AV: 4 SB: 26 1.21-1.34, 0.87-1.14 NL: 2.58E2  
T: + cEI Full ms [40.00-1000.00]

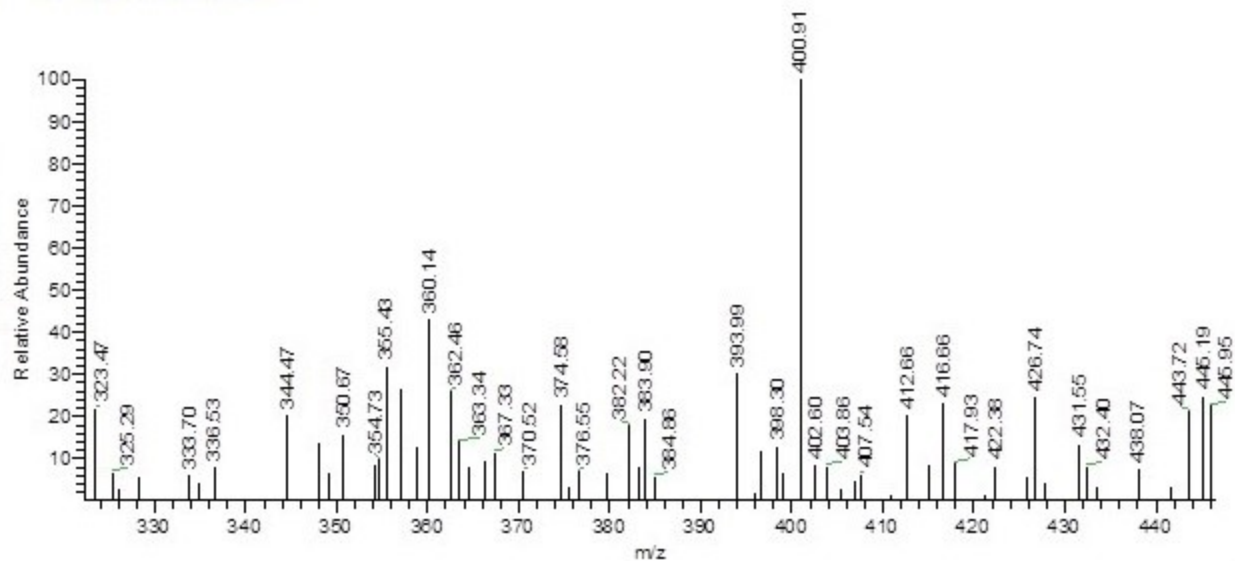

Figure S15: MS of the compound 8d.



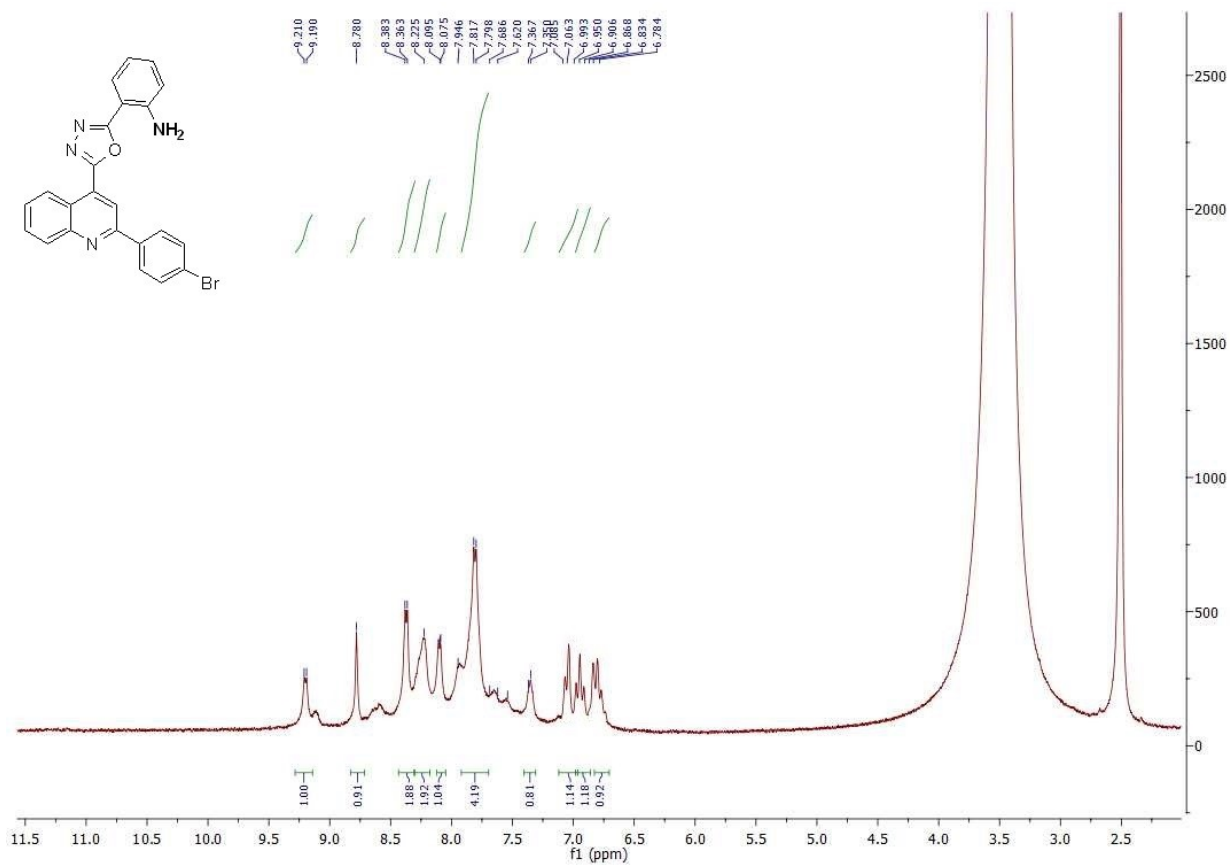

**Figure S16:** <sup>1</sup>H NMR spectrum of the compound **8e**.

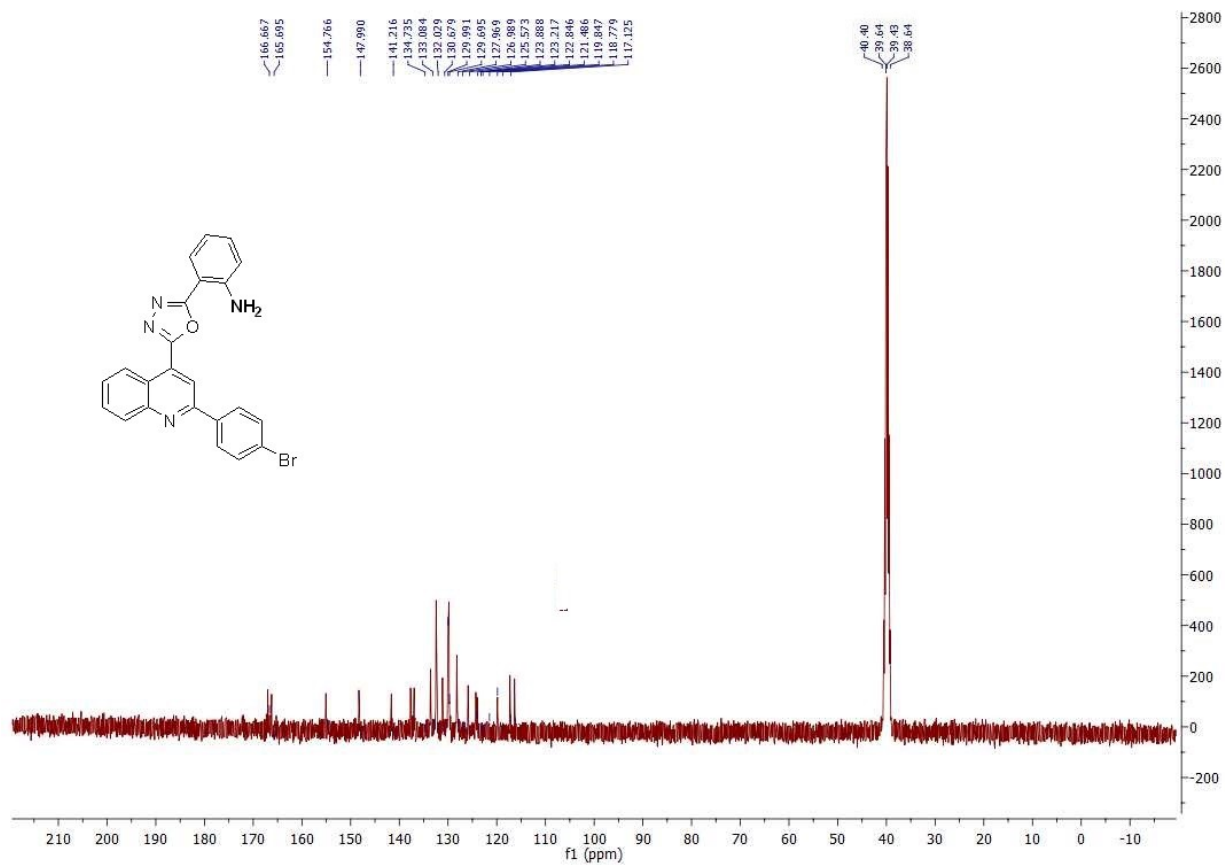

**Figure S17:**  $^{13}\text{C}$ NMR spectrum of the compound **8e**.

8e #124-127 RT: 2.09-2.14 AV: 4 SB: 26 1.21-1.34 , 0.87-1.14 NL: 1.03E2  
T: + cEI Full ms [40.00-1000.00]

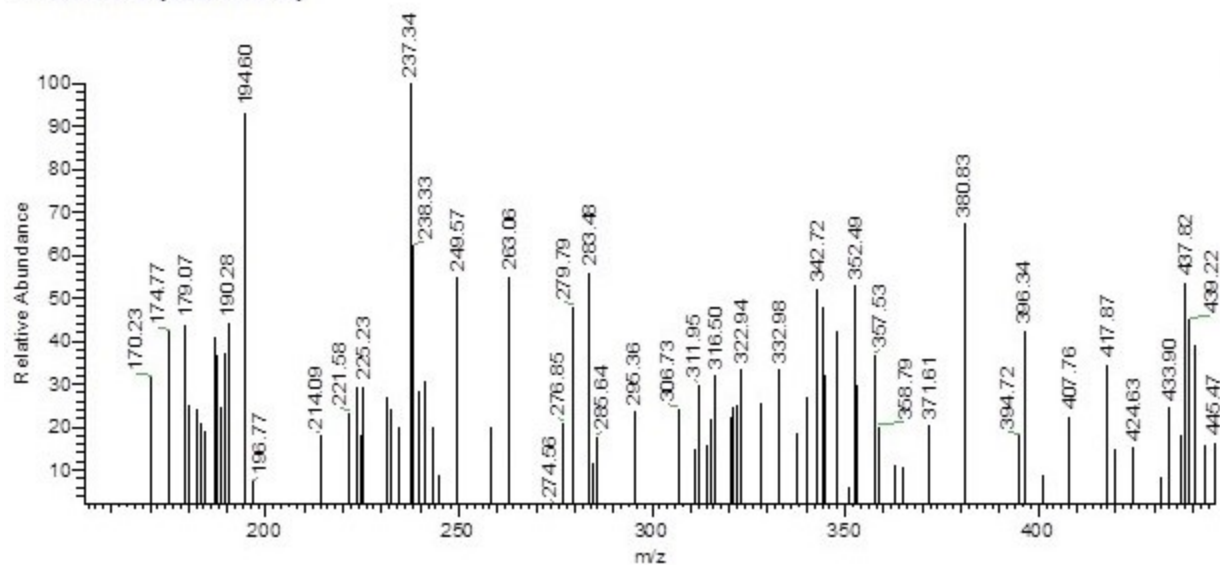

Figure S18: MS of the compound 8e.

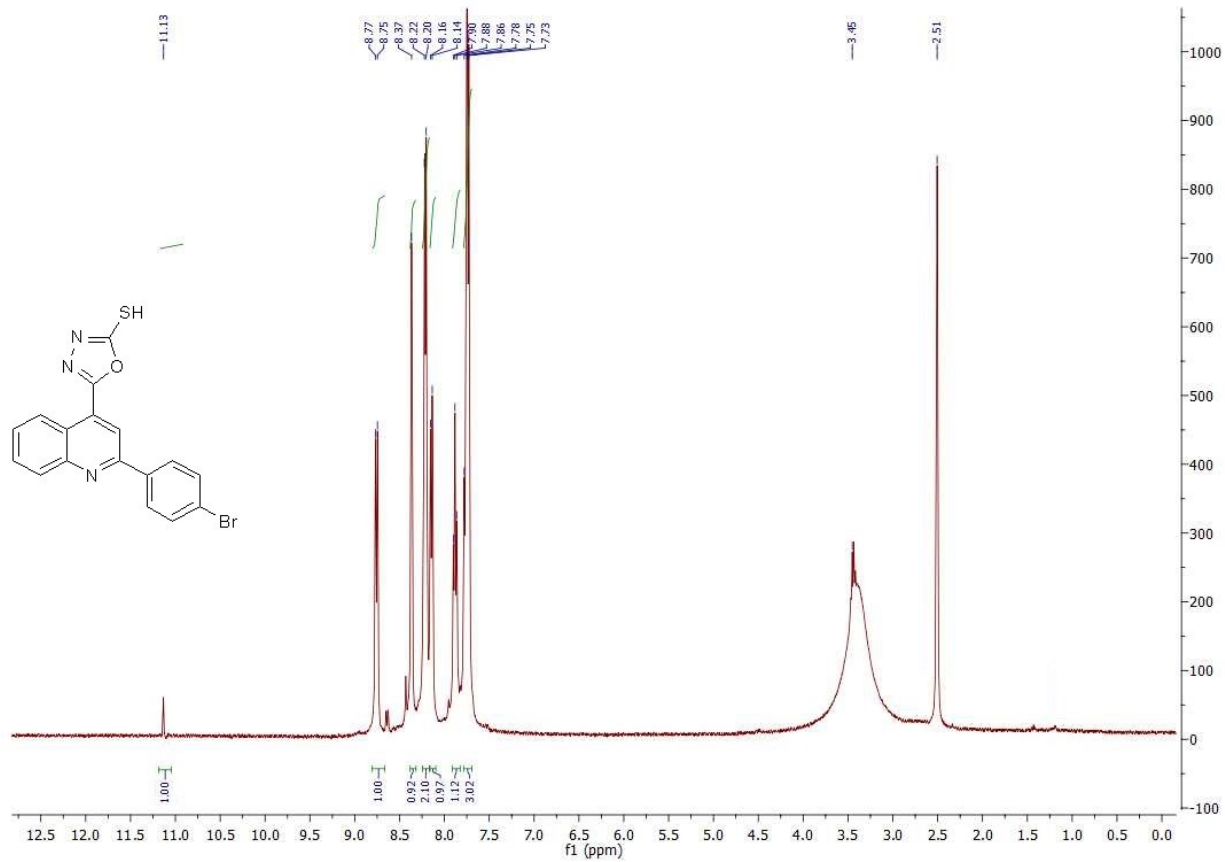

Figure S19: <sup>1</sup>H NMR spectrum of the compound 9.

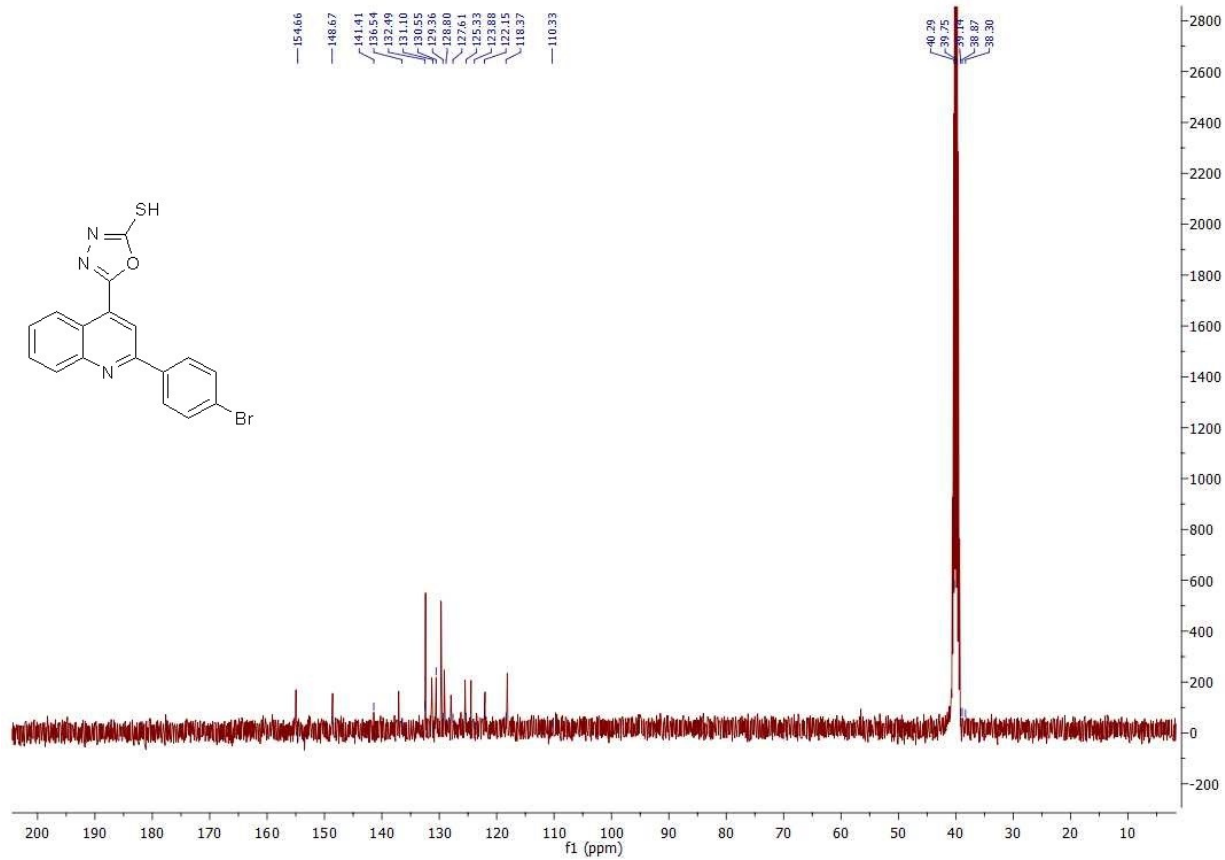

Figure S20:  $^{13}\text{C}$ NMR spectrum of the compound 9.

-9 #191-193 RT: 3.21-3.25 AV: 3 SB: 26 1.21-1.34, 0.87-1.14 NL: 1.63E2  
T: + cEI Full ms [40.00-1000.00]

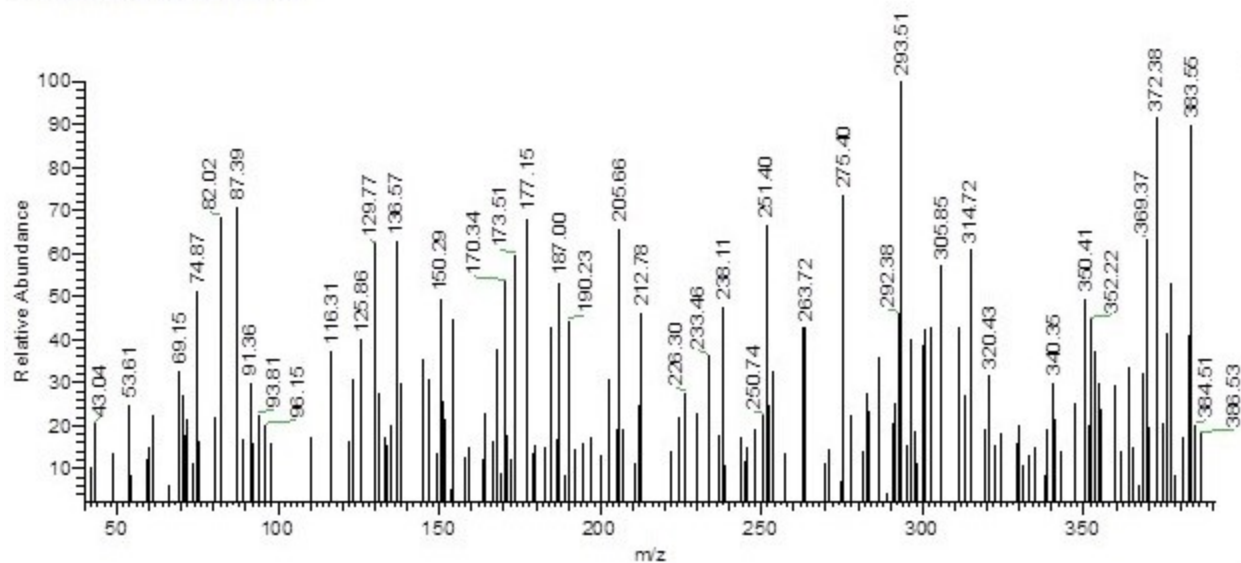

Figure S21: MS of the compound 9.

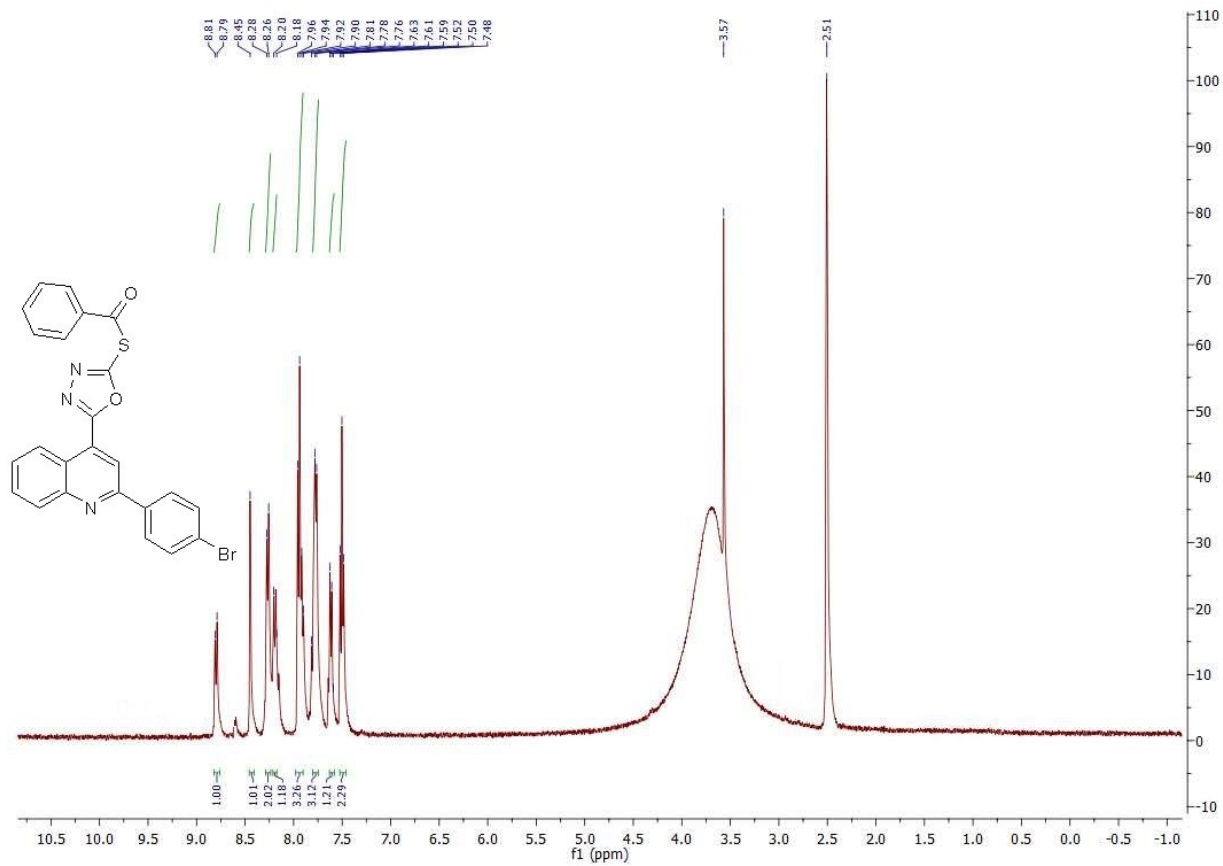

Figure S22: <sup>1</sup>H NMR spectrum of the compound 10.

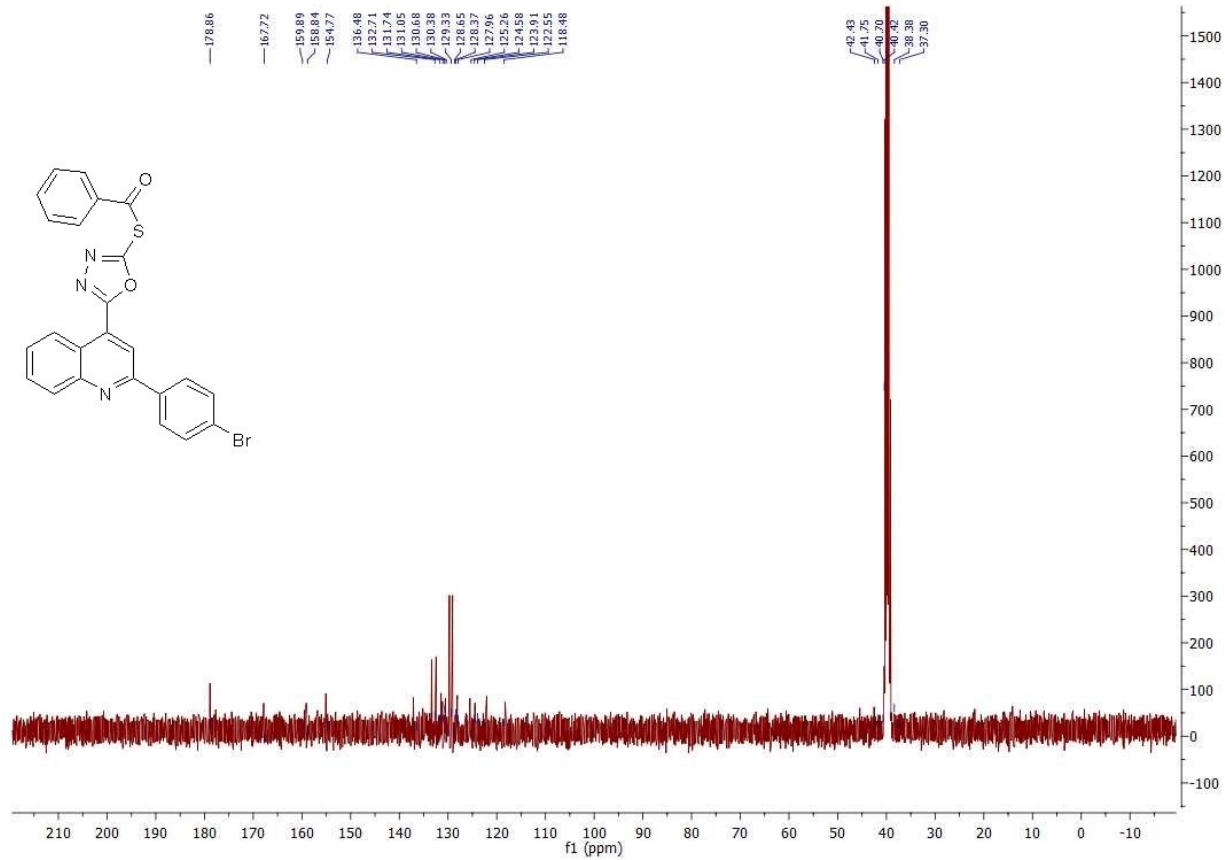

**Figure S23:** <sup>13</sup>CNMR spectrum of the compound 10.



-10 #220-221 RT: 3.70-3.72 AV: 2 SB: 26 1.21-1.34, 0.87-1.14 NL: 1.80E2  
T: + cEI Full ms [40.00-1000.00]

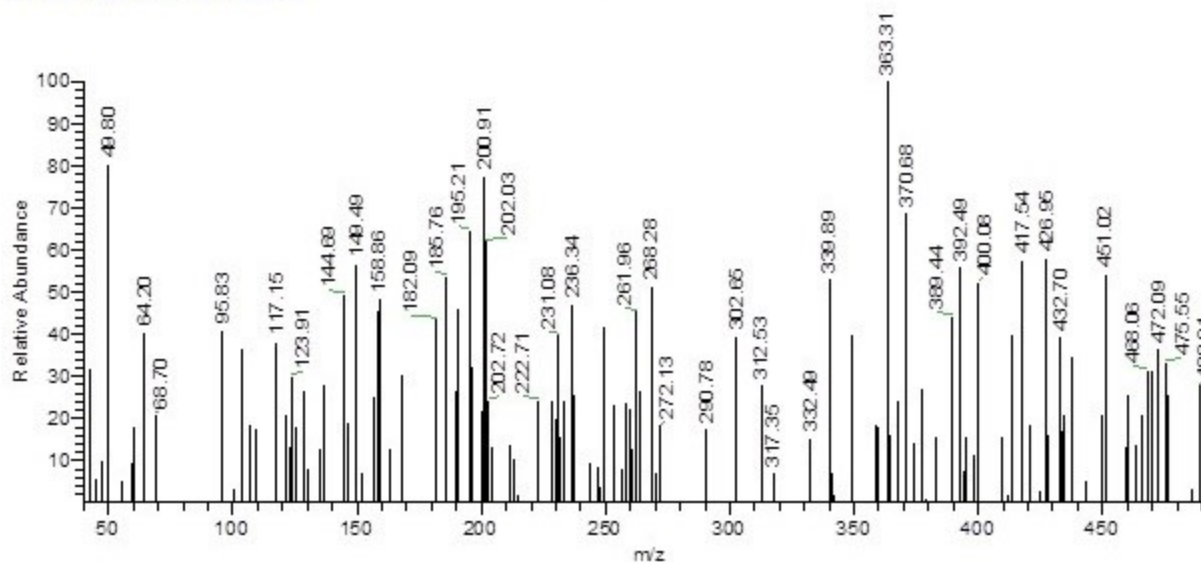

Figure S24: MS of the compound 10.

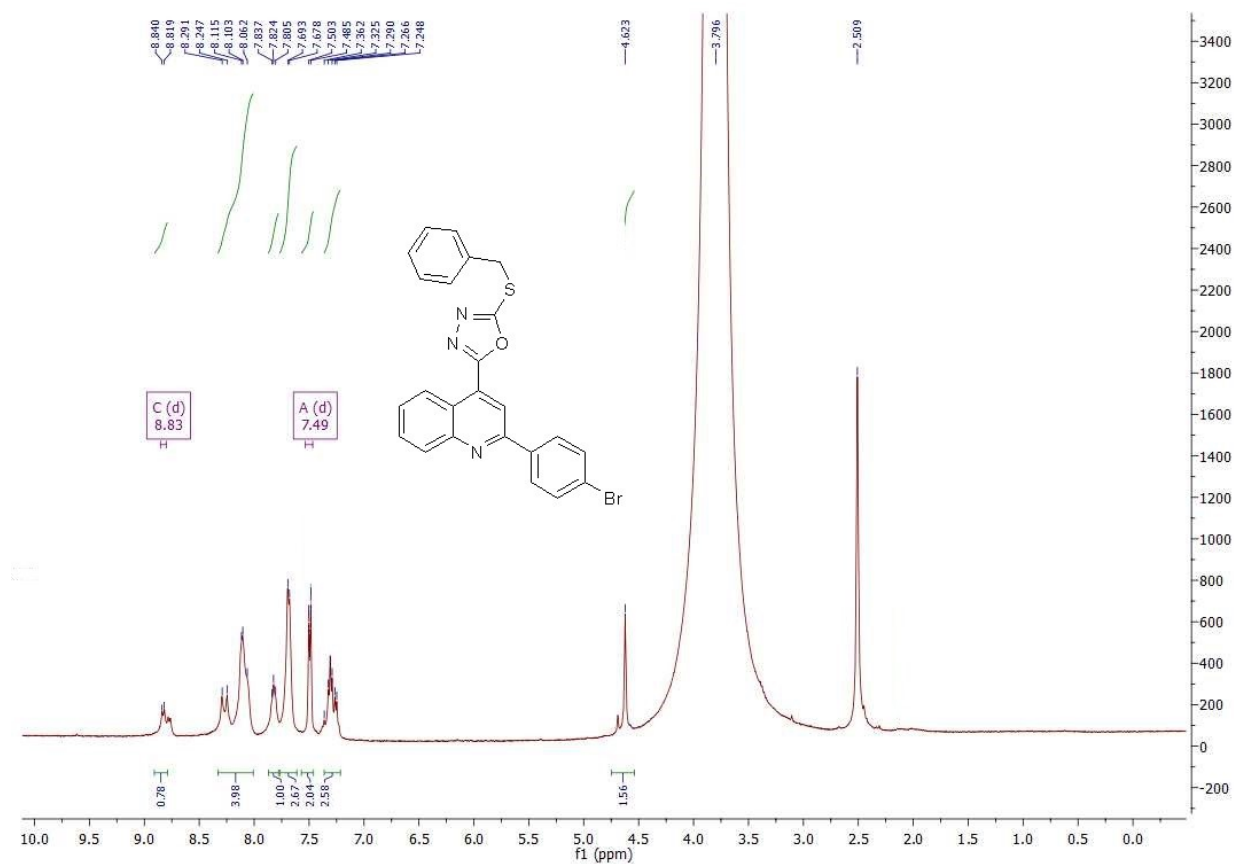

Figure S25: <sup>1</sup>H NMR spectrum of the compound 11.

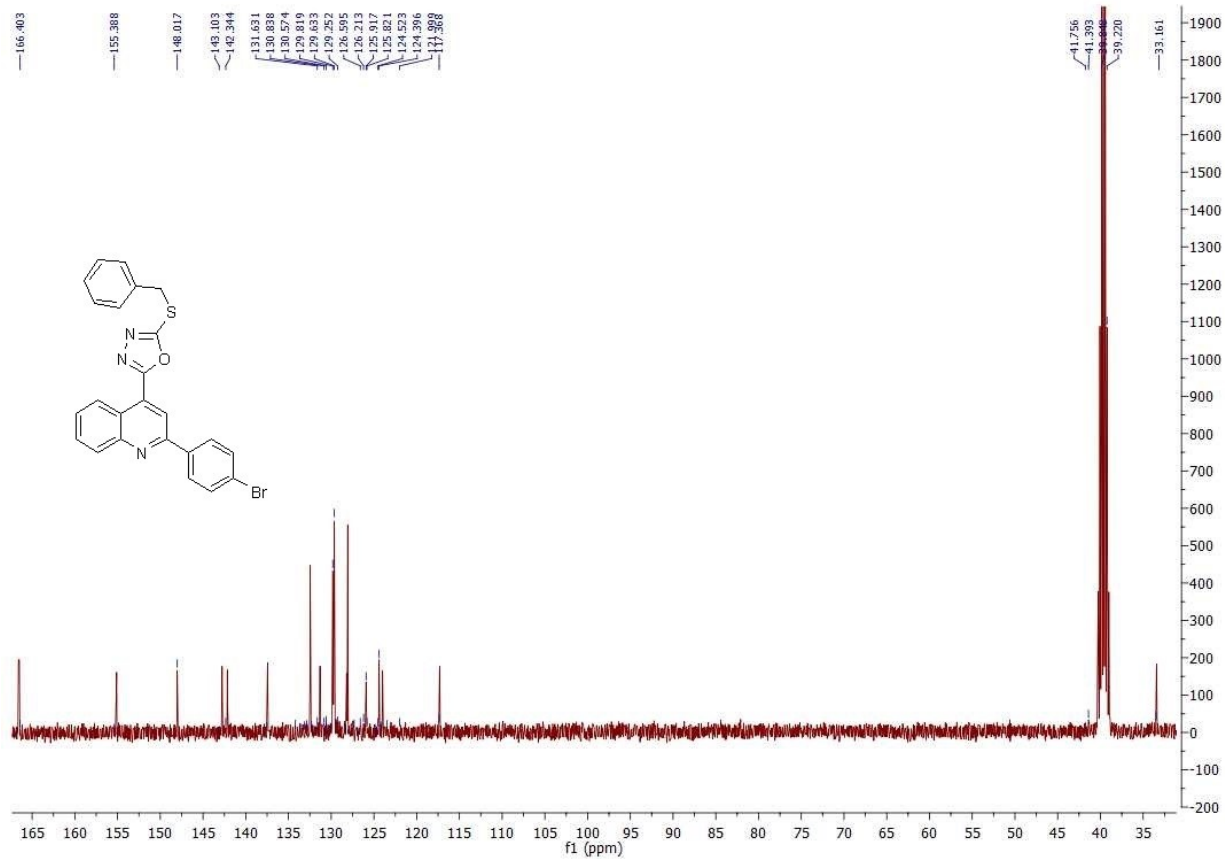

**Figure S26:** <sup>13</sup>CNMR spectrum of the compound 11.

.11#150 RT: 2.53 AV: 1 SB: 26 1.21-1.34, 0.87-1.14 NL: 2.64E2  
T: + cEI Full ms [40.00-1000.00]

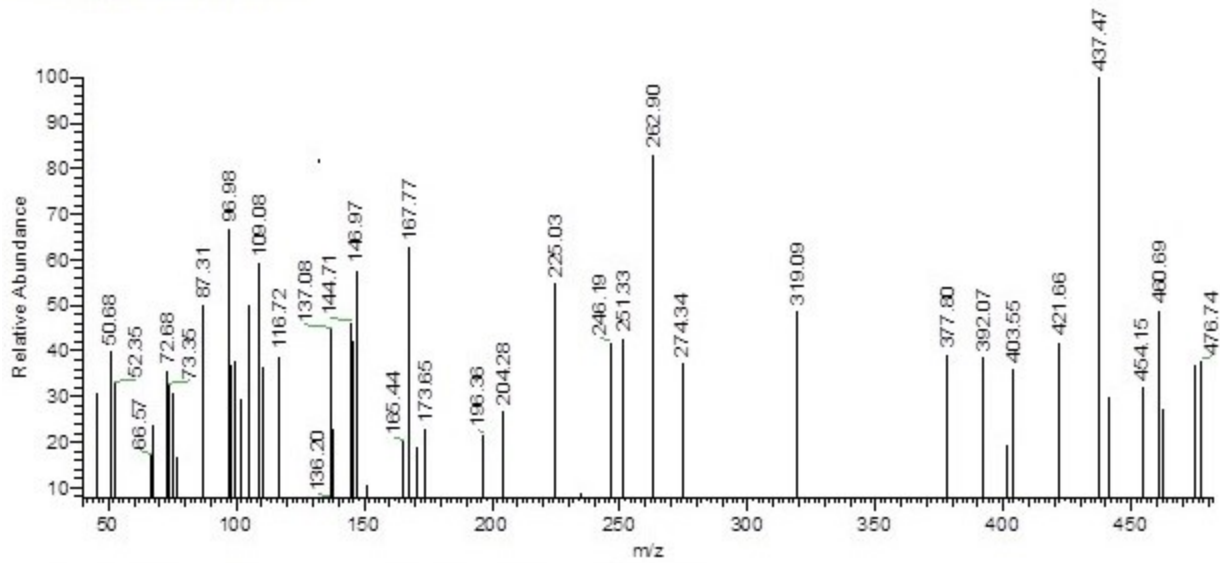

Figure S27: MS of the compound 11.

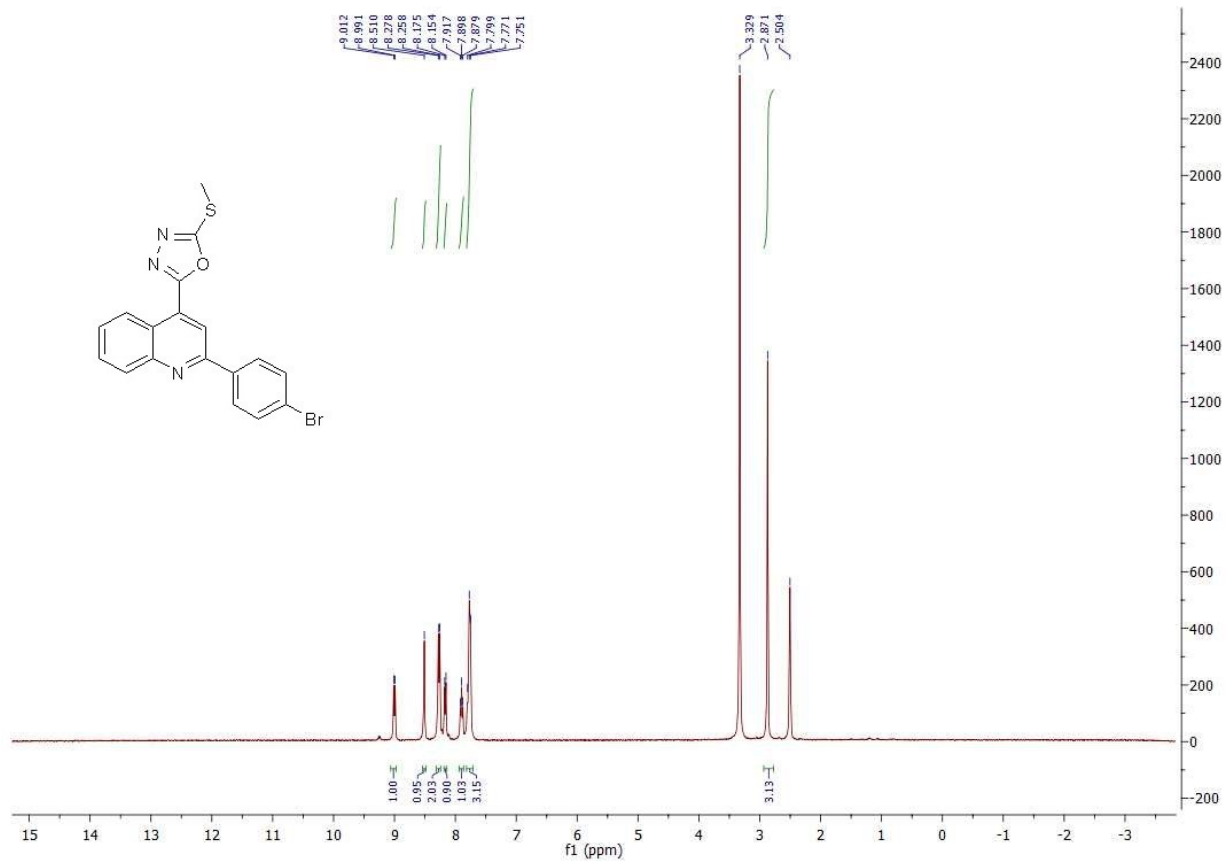

**Figure S28:** <sup>1</sup>H NMR spectrum of the compound **12a**.

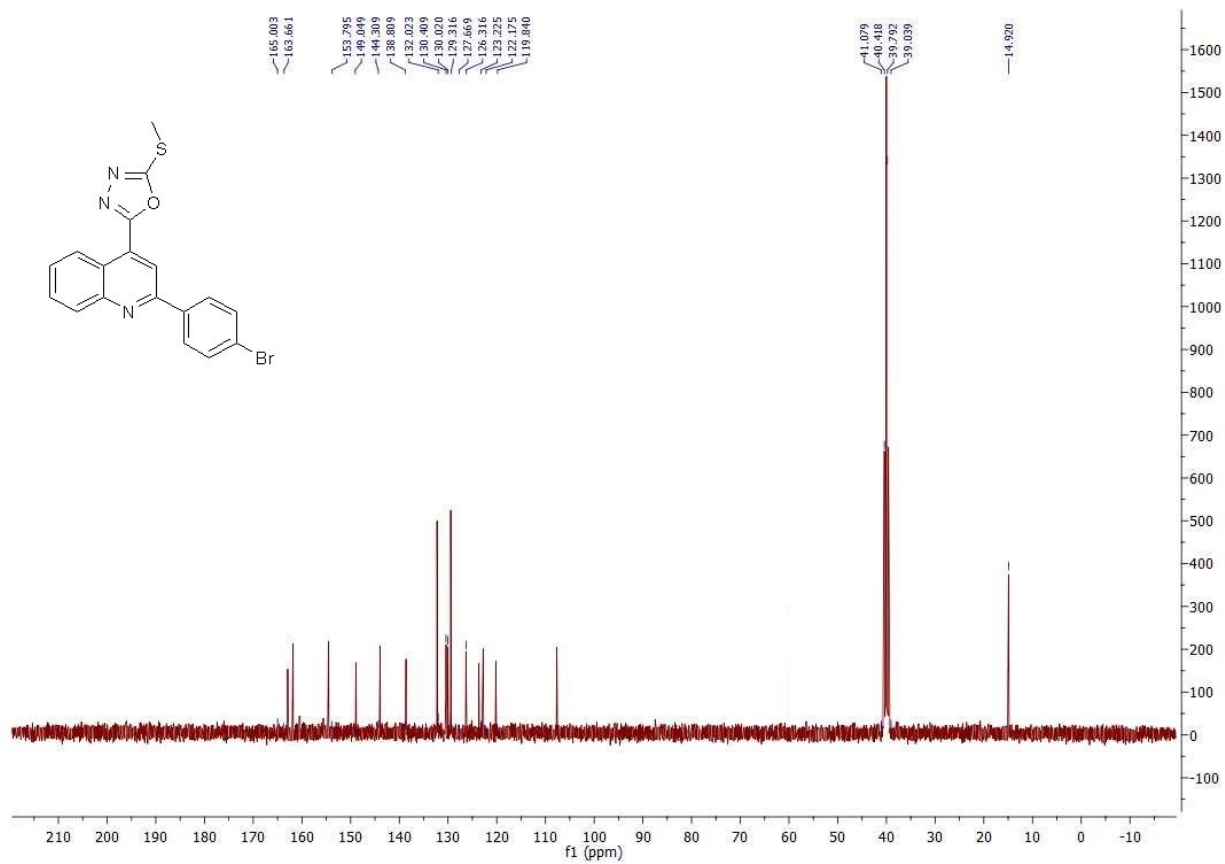

Figure S29: <sup>13</sup>CNMR spectrum of the compound 12a.

12a #276-278 RT: 4.64-4.67 AV: 3 SB: 26 1.21-1.34 , 0.87-1.14 NL: 1.60E2  
T: + cEI Full ms [40.00-1000.00]

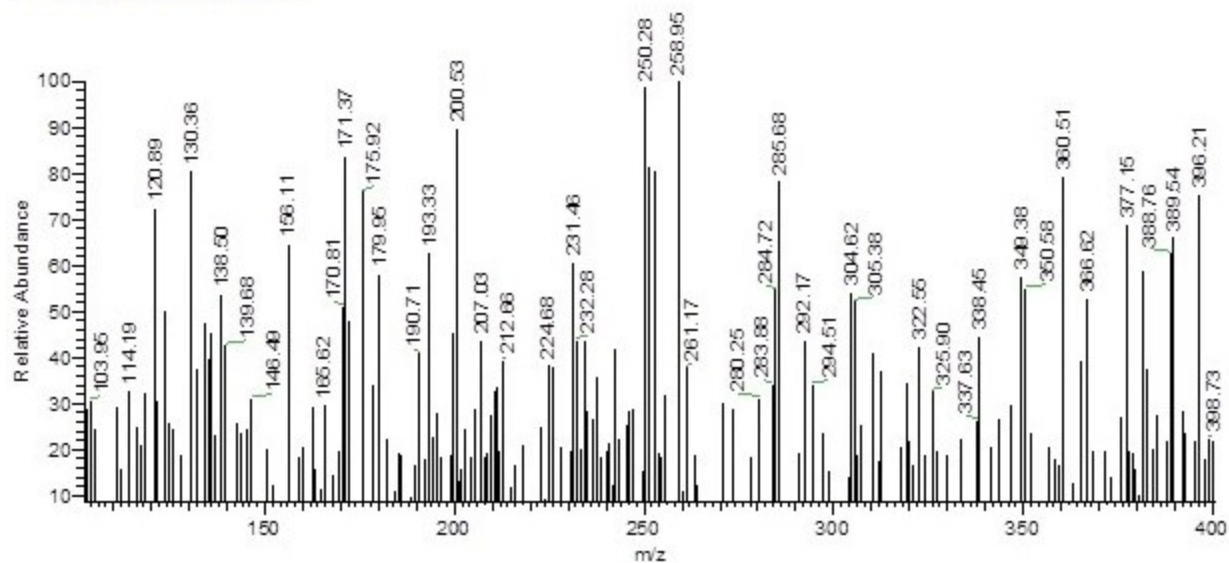

Figure S30: MS of the compound 12a.

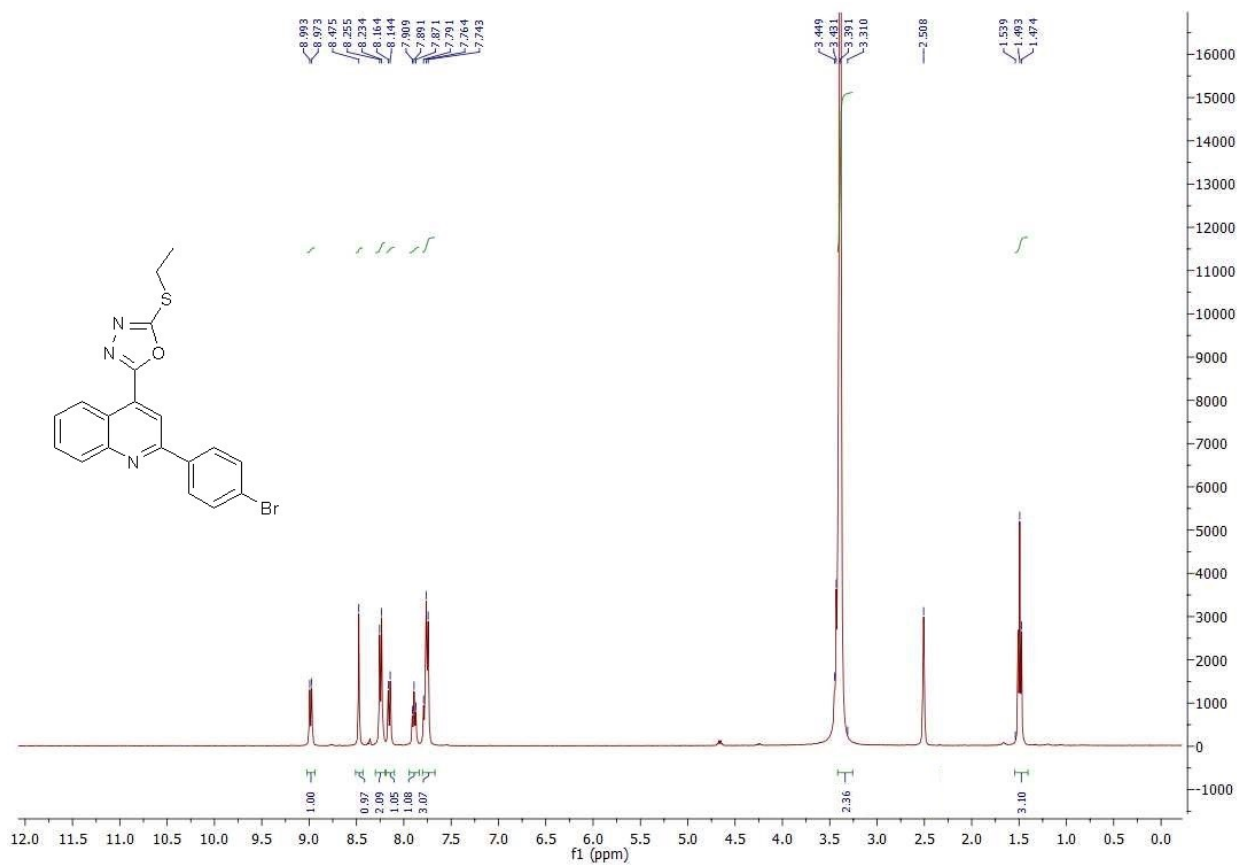

**Figure S31:**  $^1\text{H}$ NMR spectrum of the compound **12b**.

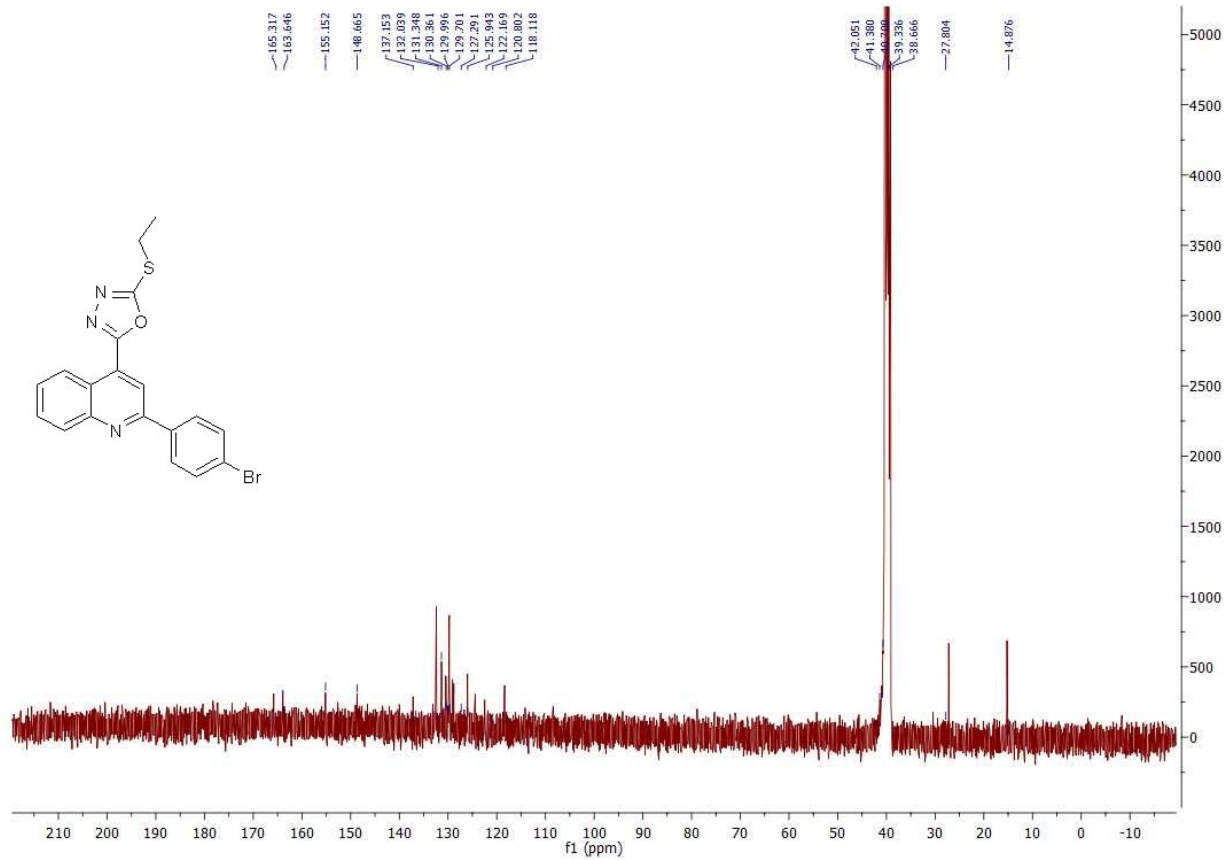

**Figure S32:** <sup>13</sup>CNMR spectrum of the compound **12b**.



-12b #90-91 RT: 1.52-1.54 AV: 2 SB: 28 1.21-1.34, 0.87-1.14 NL: 1.51E2  
T: + cEI Full ms [40.00-1000.00]

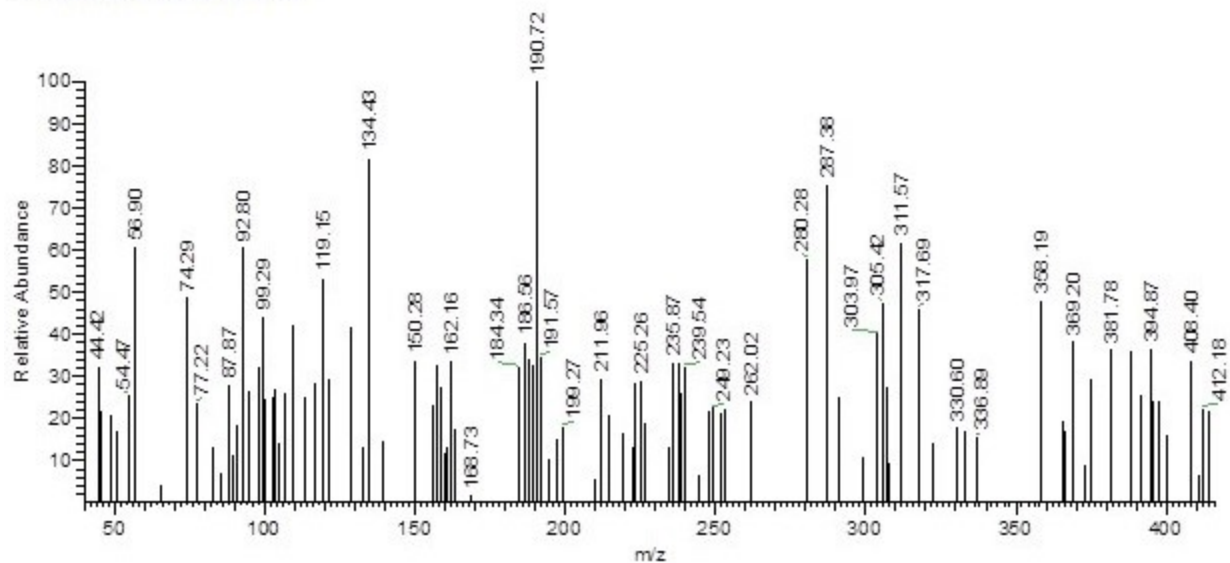

Figure S33: MS of the compound 12b.

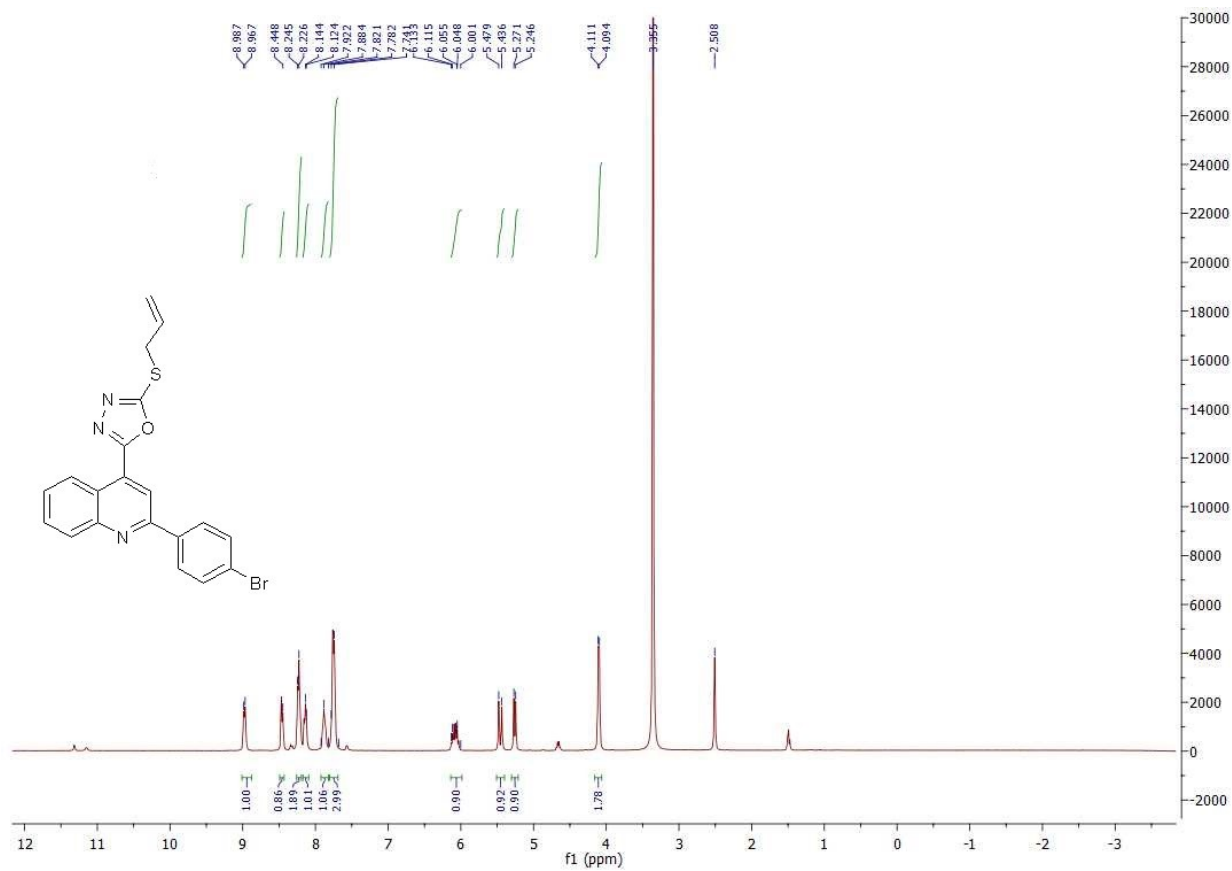

**Figure S34:**  $^1\text{H}$ NMR spectrum of the compound 12c.

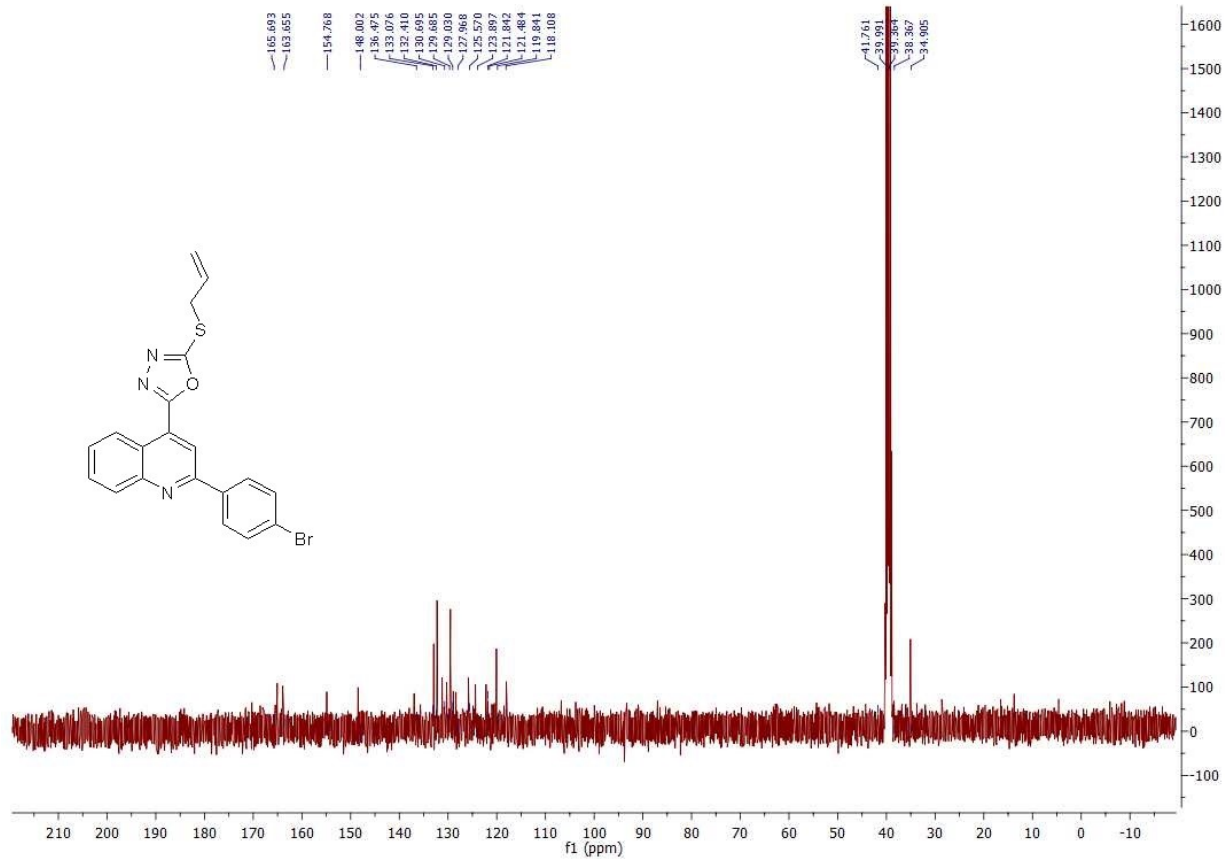

Figure S35: <sup>13</sup>CNMR spectrum of the compound 12c.

12c #188-191 RT: 3.16-3.21 AV: 4 SB: 2 1.17 , 1.17 NL: 1.34E2  
T: + cEI Full ms [40.00-1000.00]

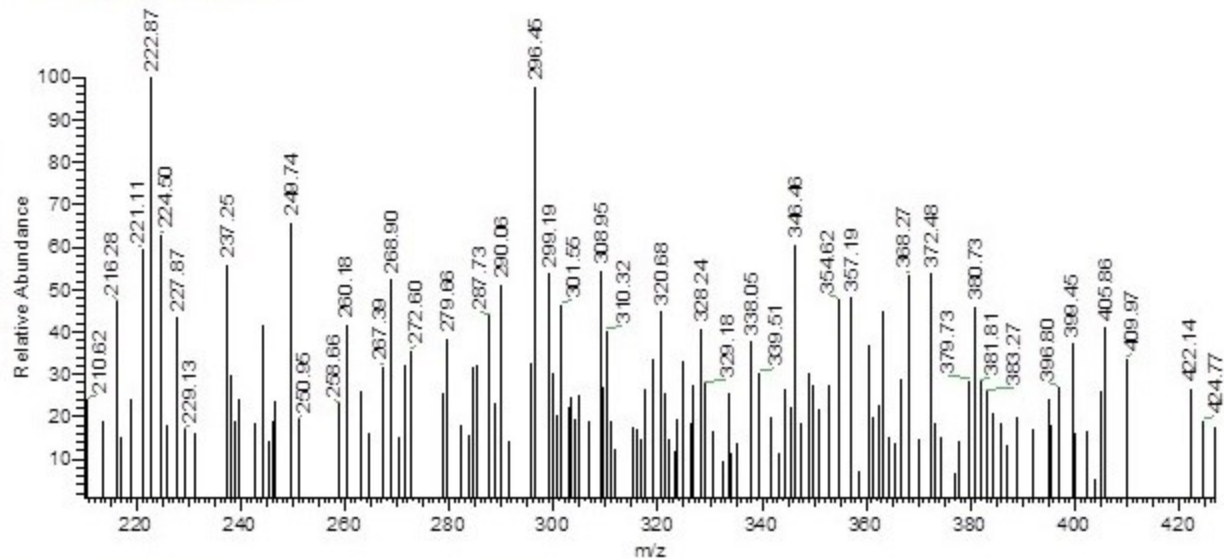

Figure S36: MS of the compound 12c.

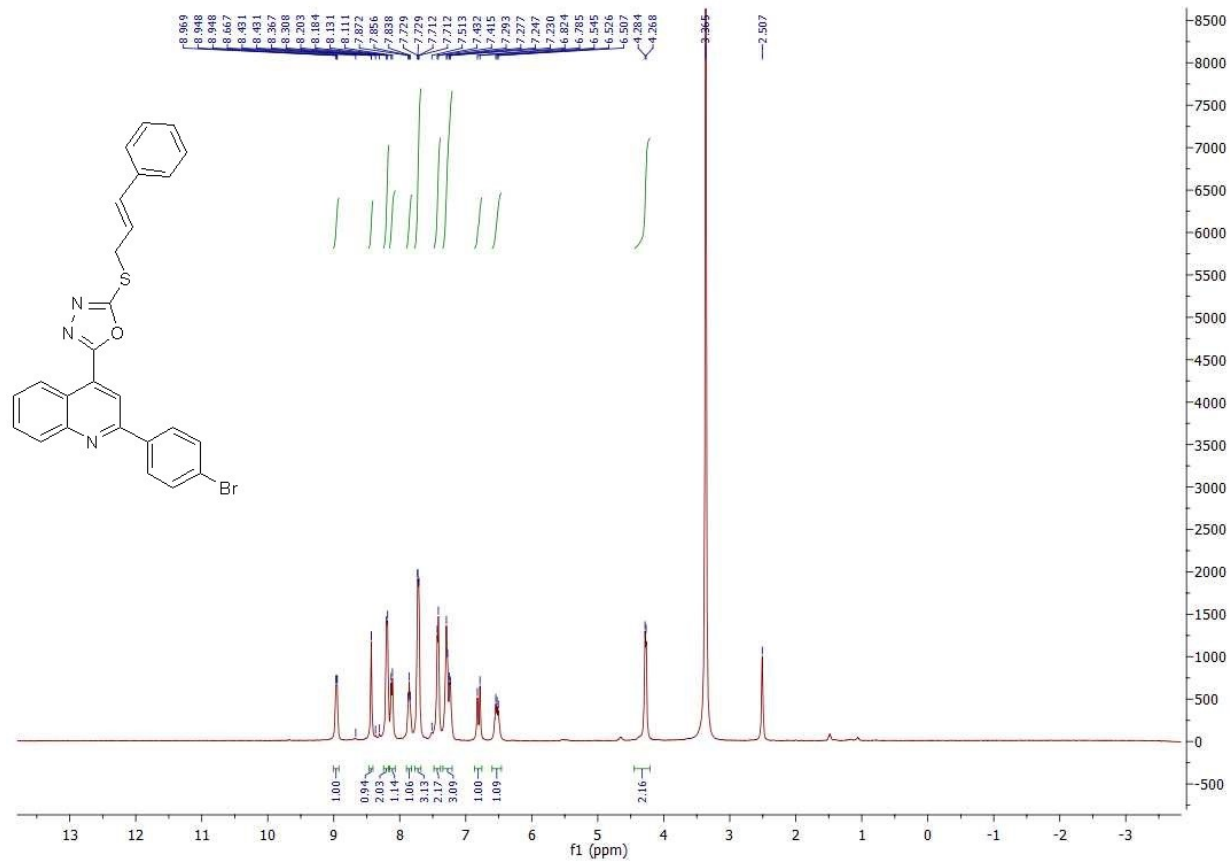

**Figure S37:** <sup>1</sup>H NMR spectrum of the compound **12d**.

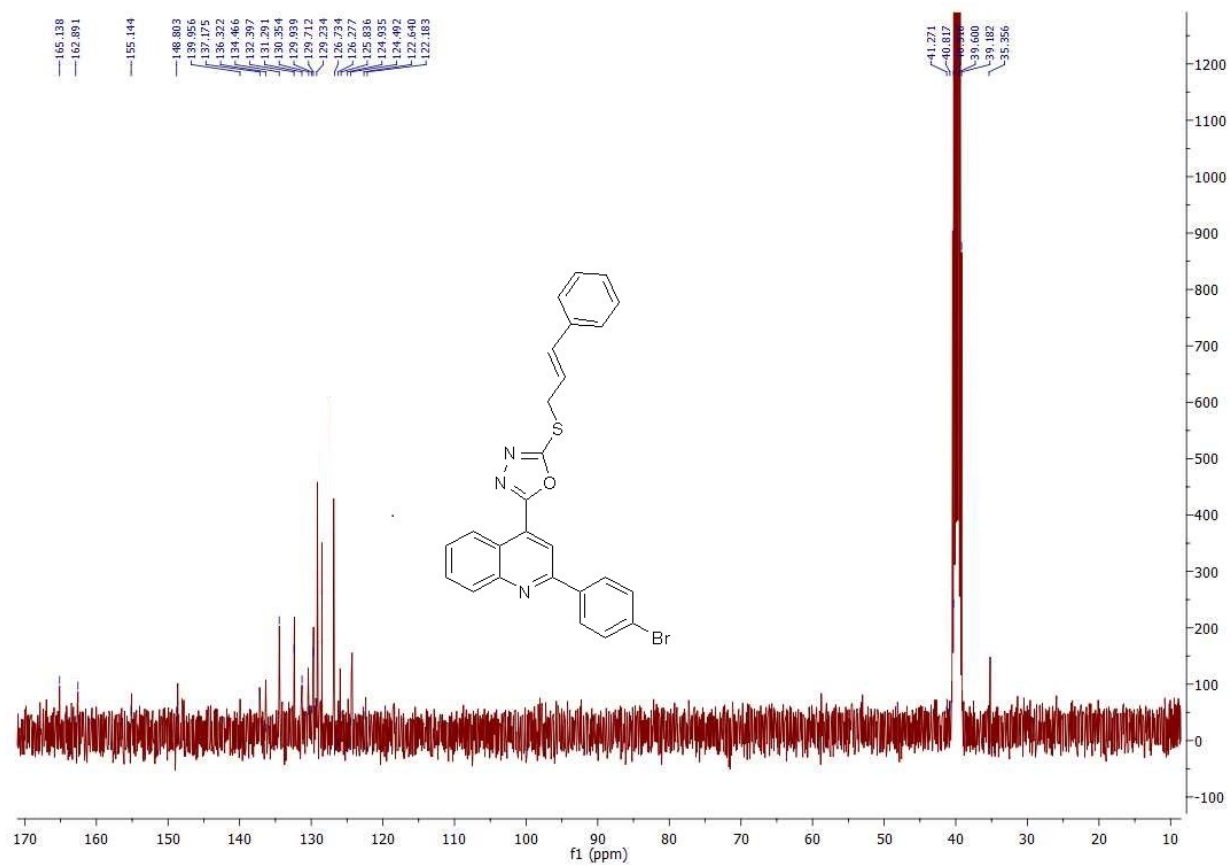

**Figure S38:** <sup>13</sup>CNMR spectrum of the compound **12d**.

#12d #173-174 RT: 2.91-2.93 AV: 2 SB: 26 1.21-1.34, 0.87-1.14 NL: 2.07E2  
T: + cEI Full ms [40.00-1000.00]

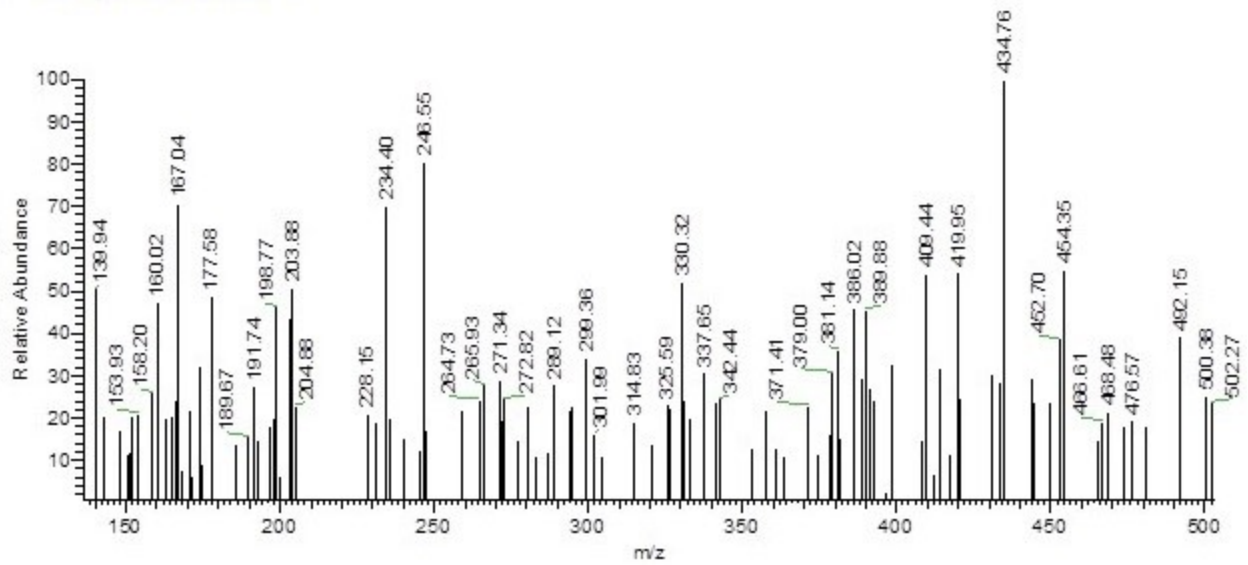

Figure S39: MS of the compound 12d.

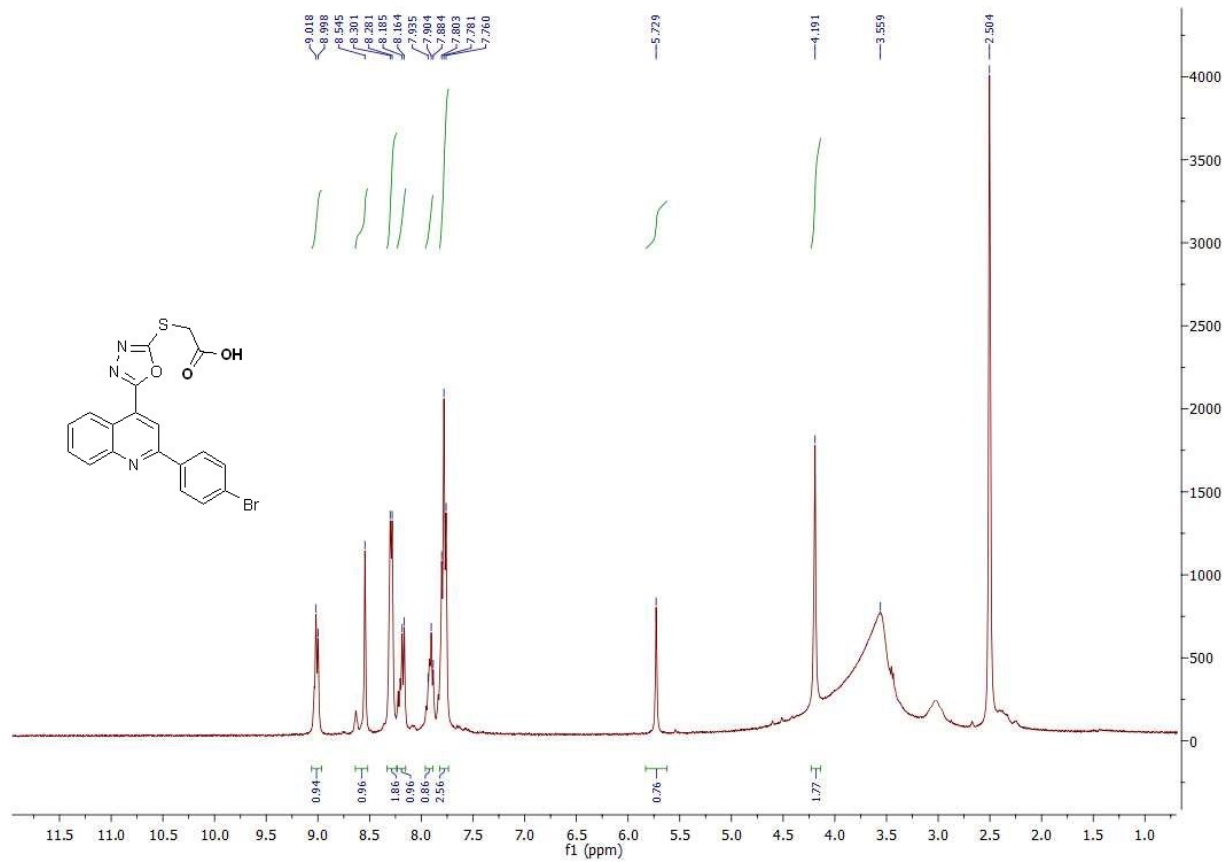

**Figure S40:**  $^1\text{H}$ NMR spectrum of the compound 13.



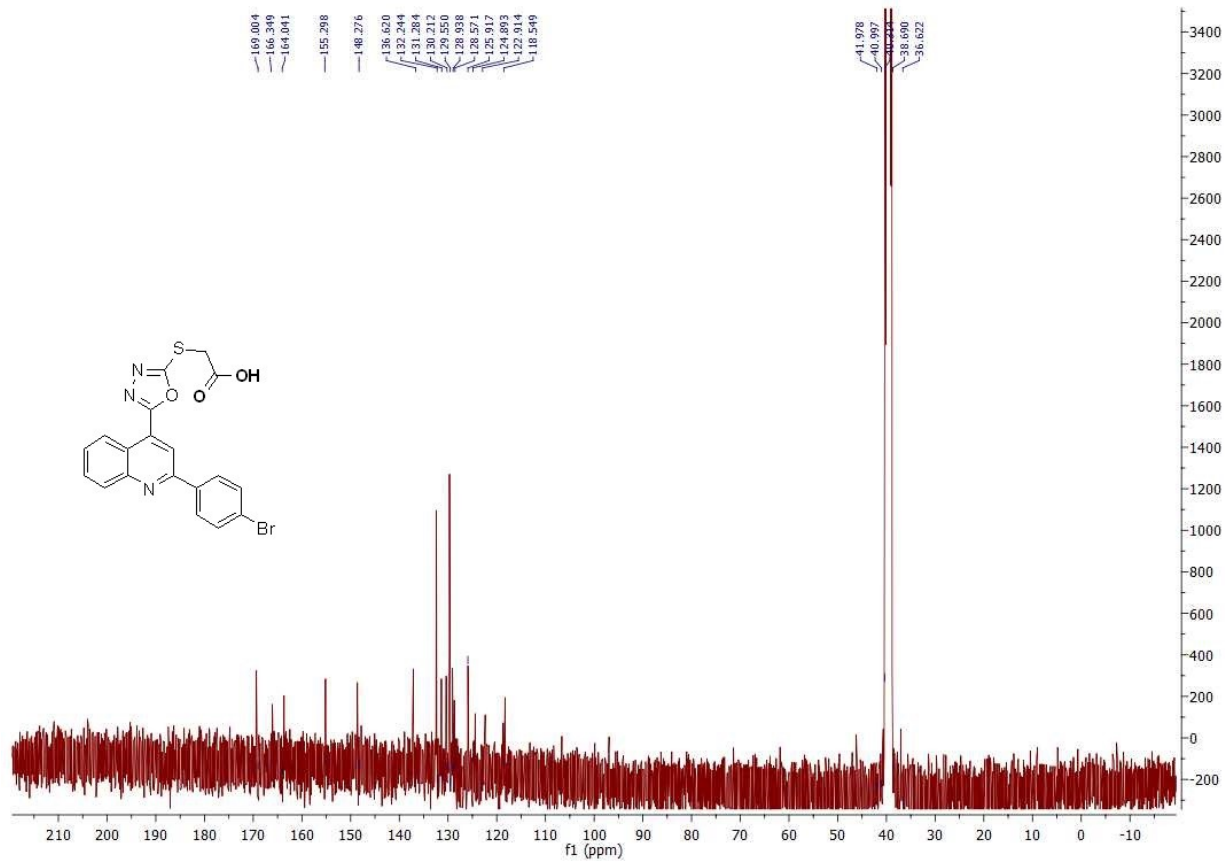

**Figure S41:** <sup>13</sup>CNMR spectrum of the compound **13**.

13#265-267 RT: 4.45-4.49 AV: 3 SB: 26 1.21-1.34, 0.87-1.14 NL: 1.16E2  
T: + cEI Full ms [40.00-1000.00]

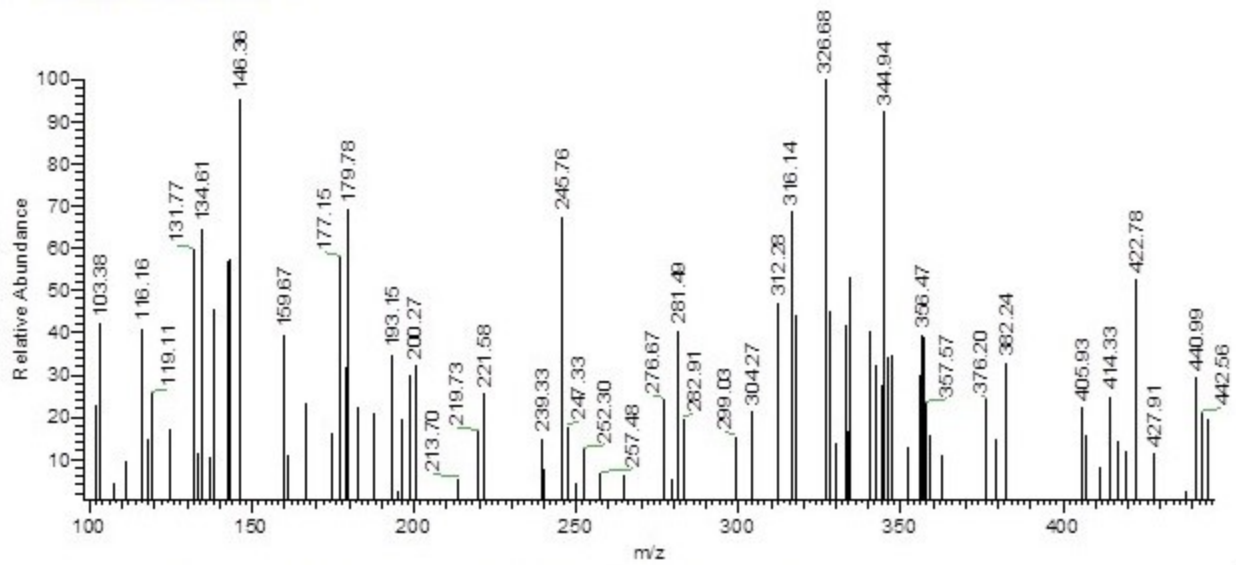

Figure S42: MS of the compound 13.

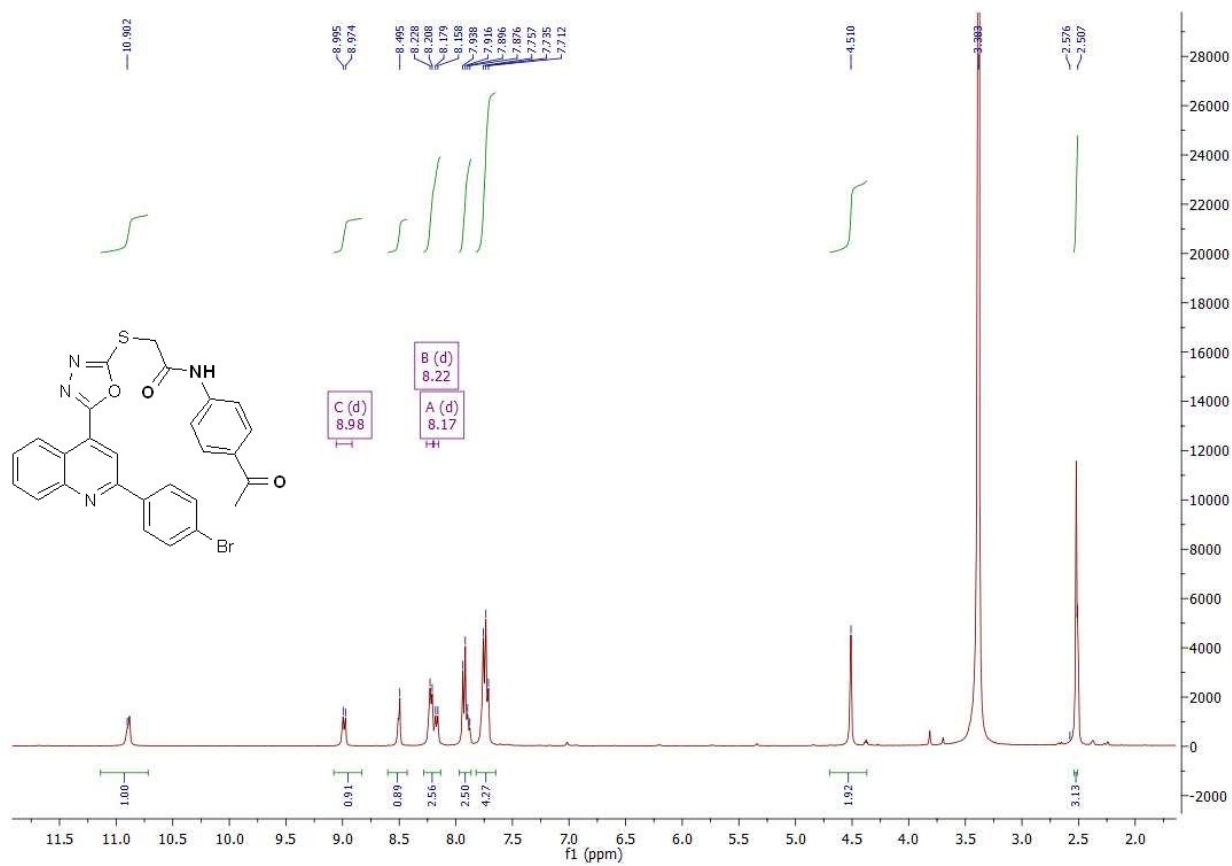

**Figure S43:**  $^1\text{H}$ NMR spectrum of the compound 14.

-14 #82-64 RT: 1.05-1.09 AV: 3 SB: 26 1.21-1.34 , 0.87-1.14 NL: 1.73E2  
T: + cEI Full ms [40.00-1000.00]

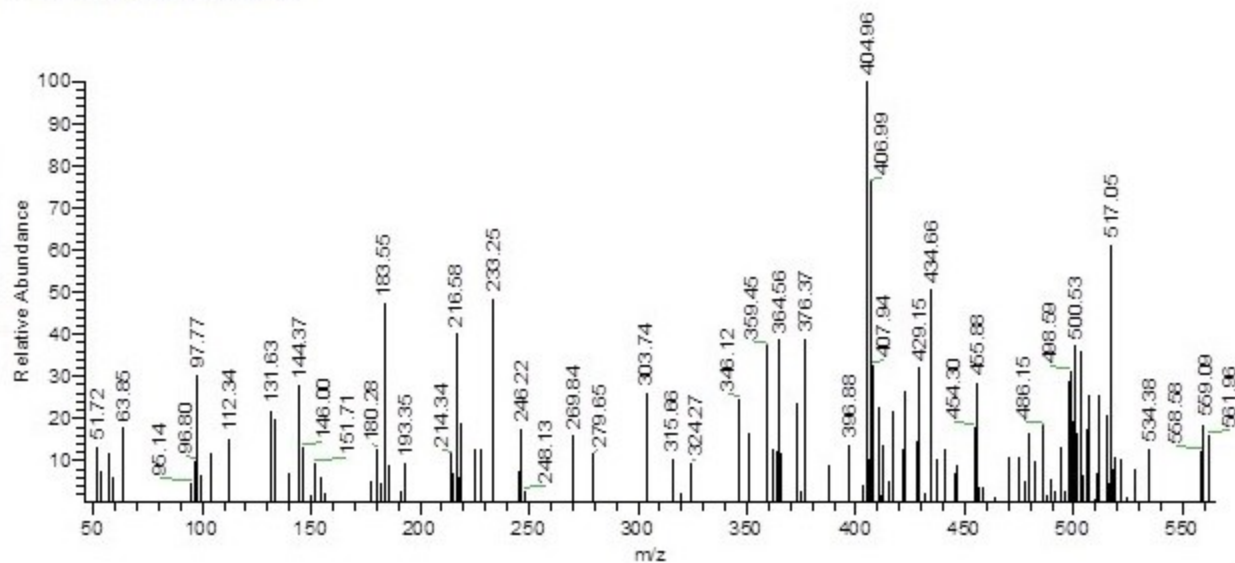

Figure S44: MS of the compound 14.

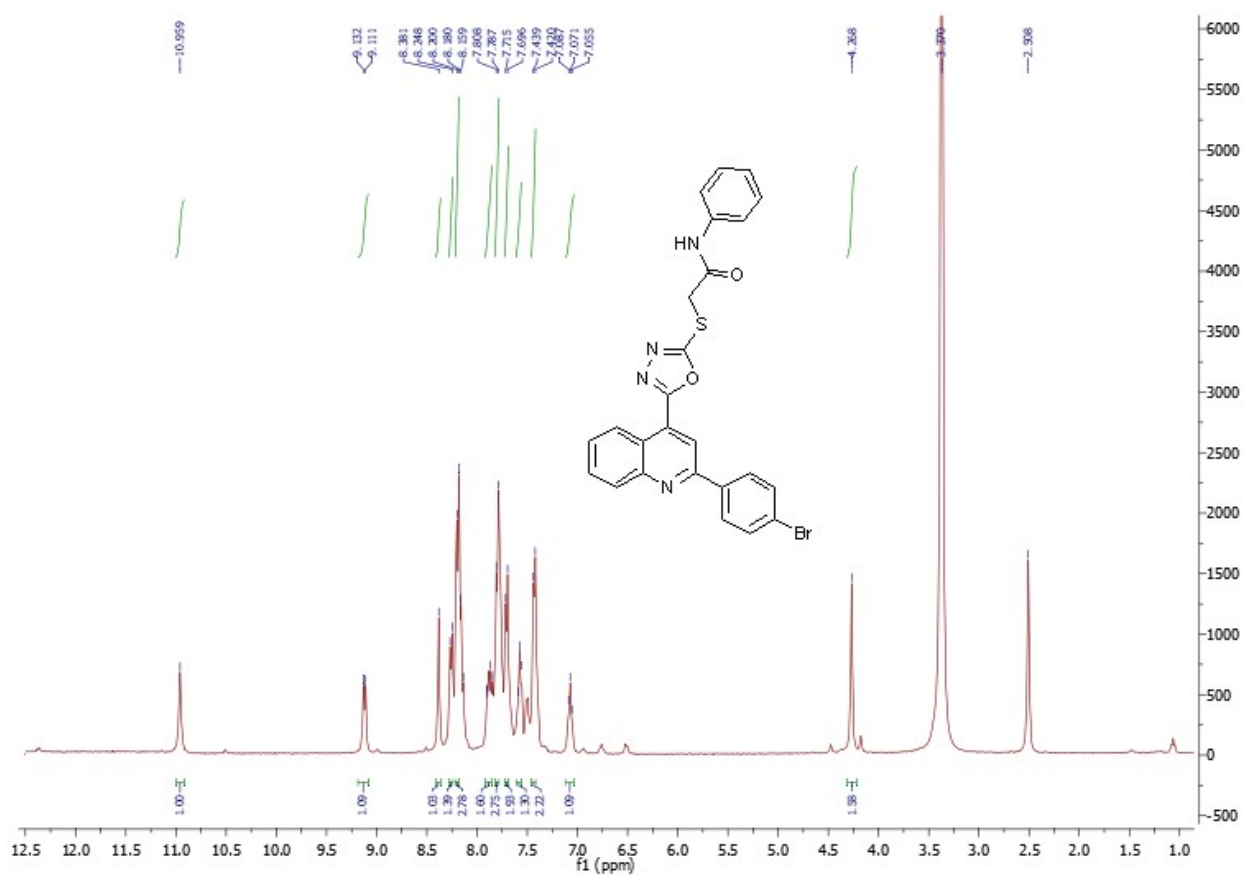

**Figure S45:**  $^1\text{H}$ NMR spectrum of the compound **15a**.

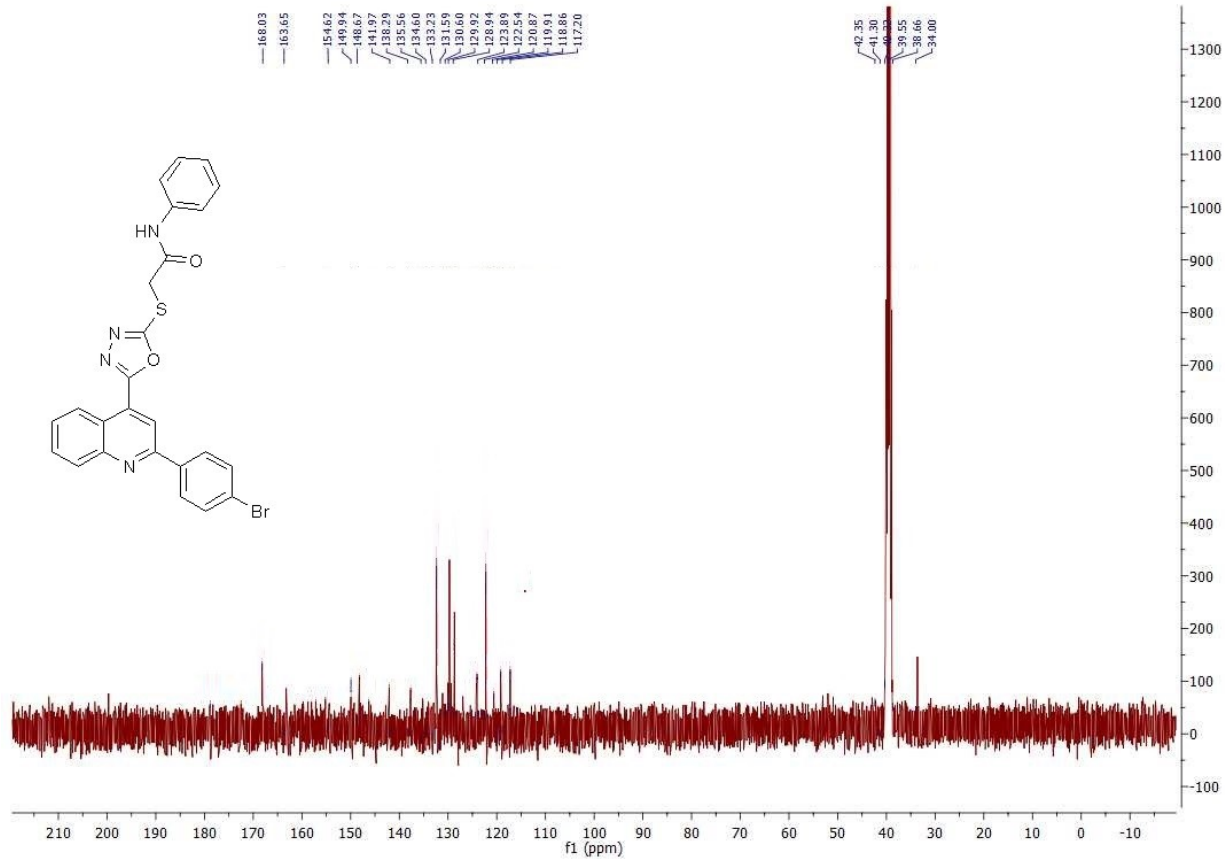

**Figure S46:**  $^{13}\text{C}$ NMR spectrum of the compound 15a.

15a #161-163 RT: 2.71-2.74 AV: 3 SB: 26 1.21-1.34 , 0.87-1.14 NL: 1.38E2  
T: + cEI Full ms [40.00-1000.00]

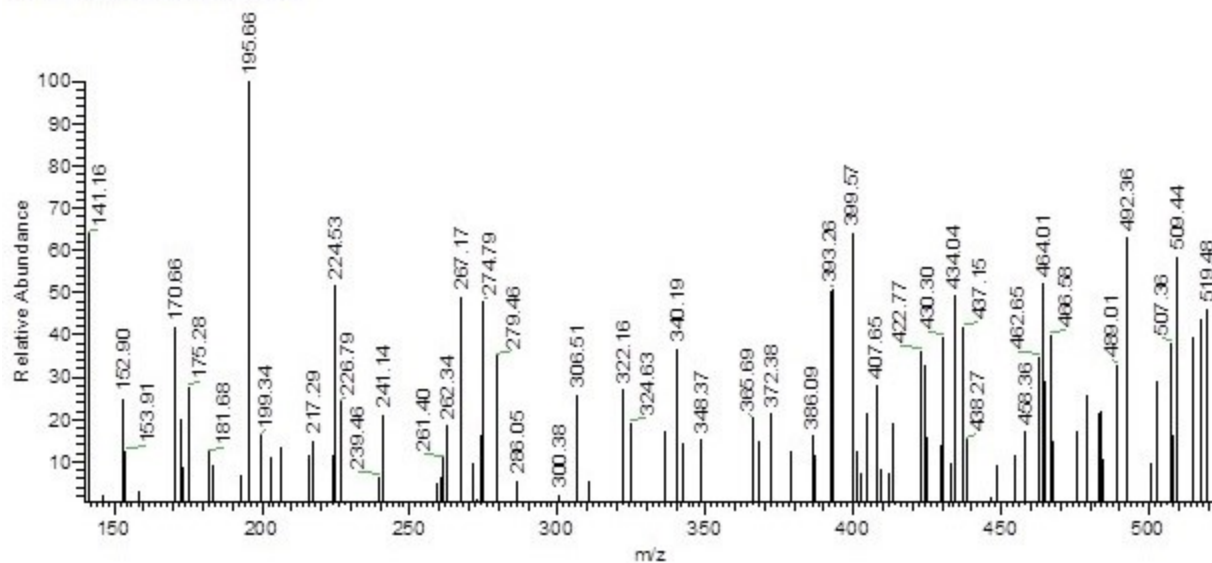

Figure S47: MS of the compound 15a.

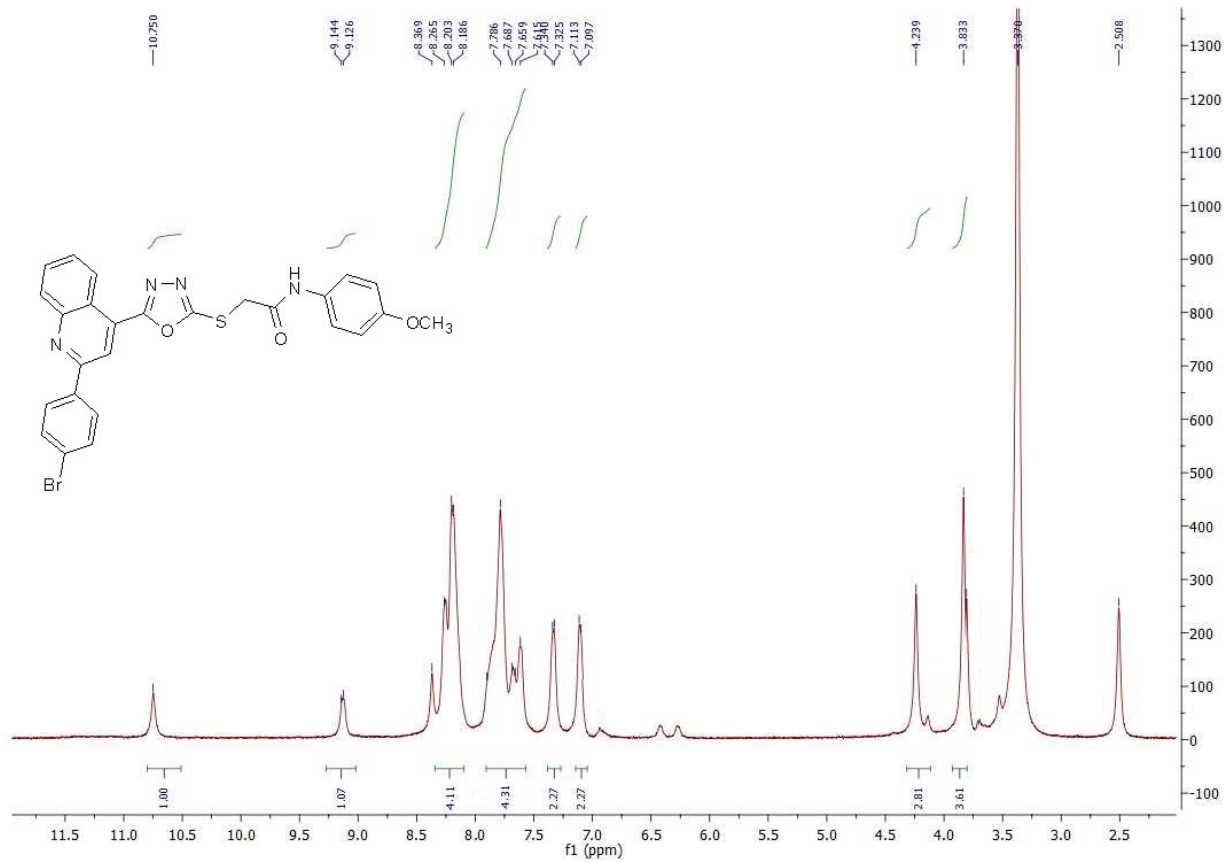

**Figure S48:**  $^1\text{H NMR}$  spectrum of the compound **15b**.



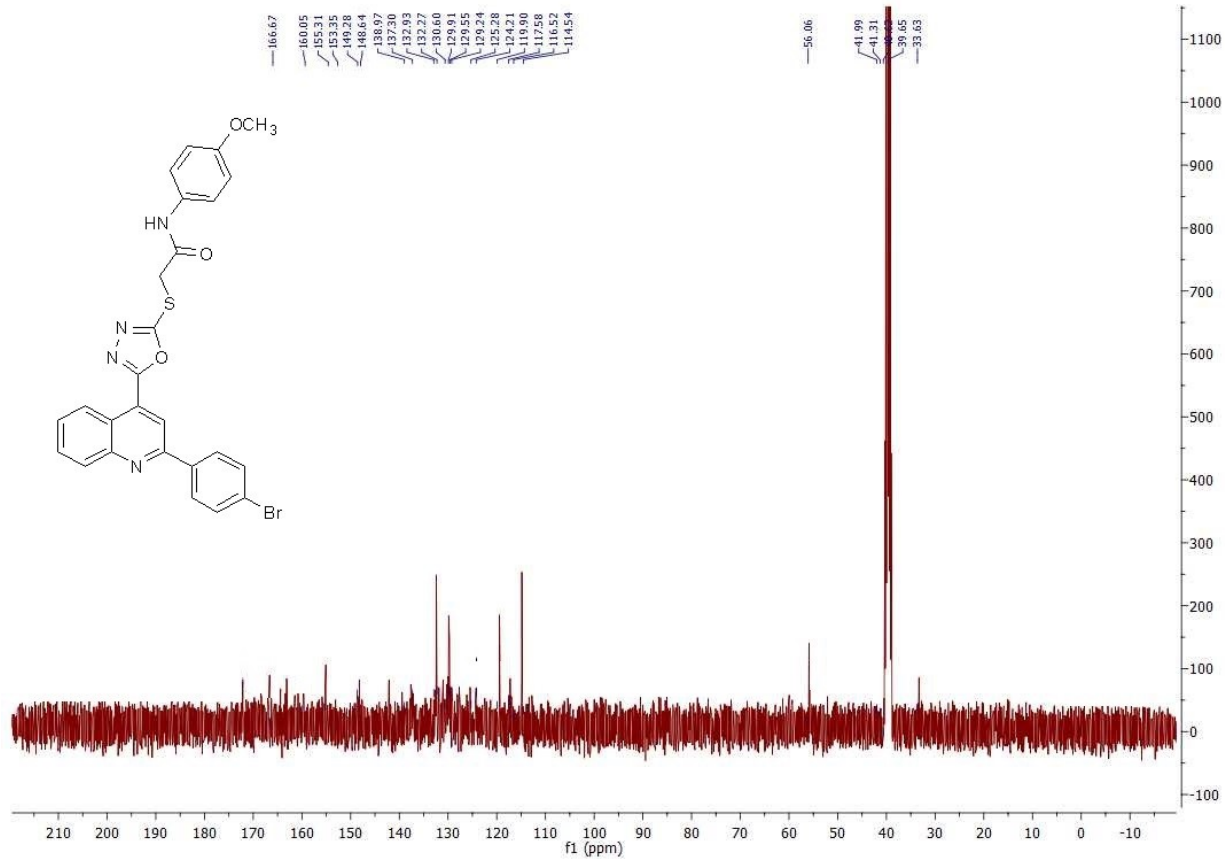

**Figure S49:** <sup>13</sup>CNMR spectrum of the compound **15b**.

15b #204 RT: 3.43 AV: 1 SB: 26 1.21-1.34, 0.87-1.14 NL: 4.27E2  
T: + cEI Full ms [40.00-1000.00]

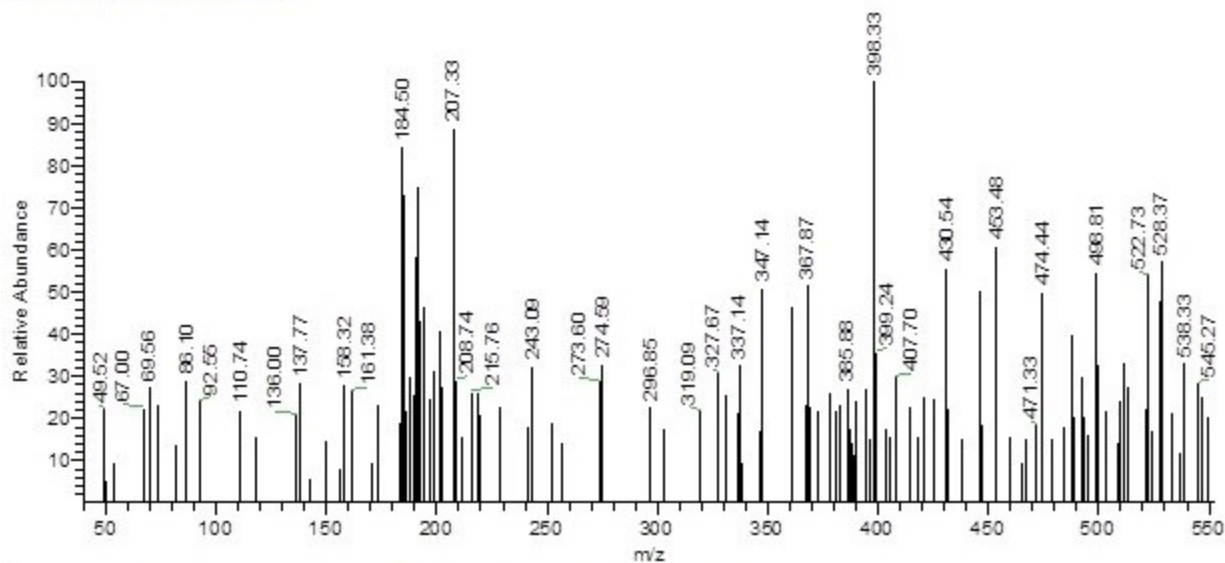

Figure S50: MS of the compound 15b.

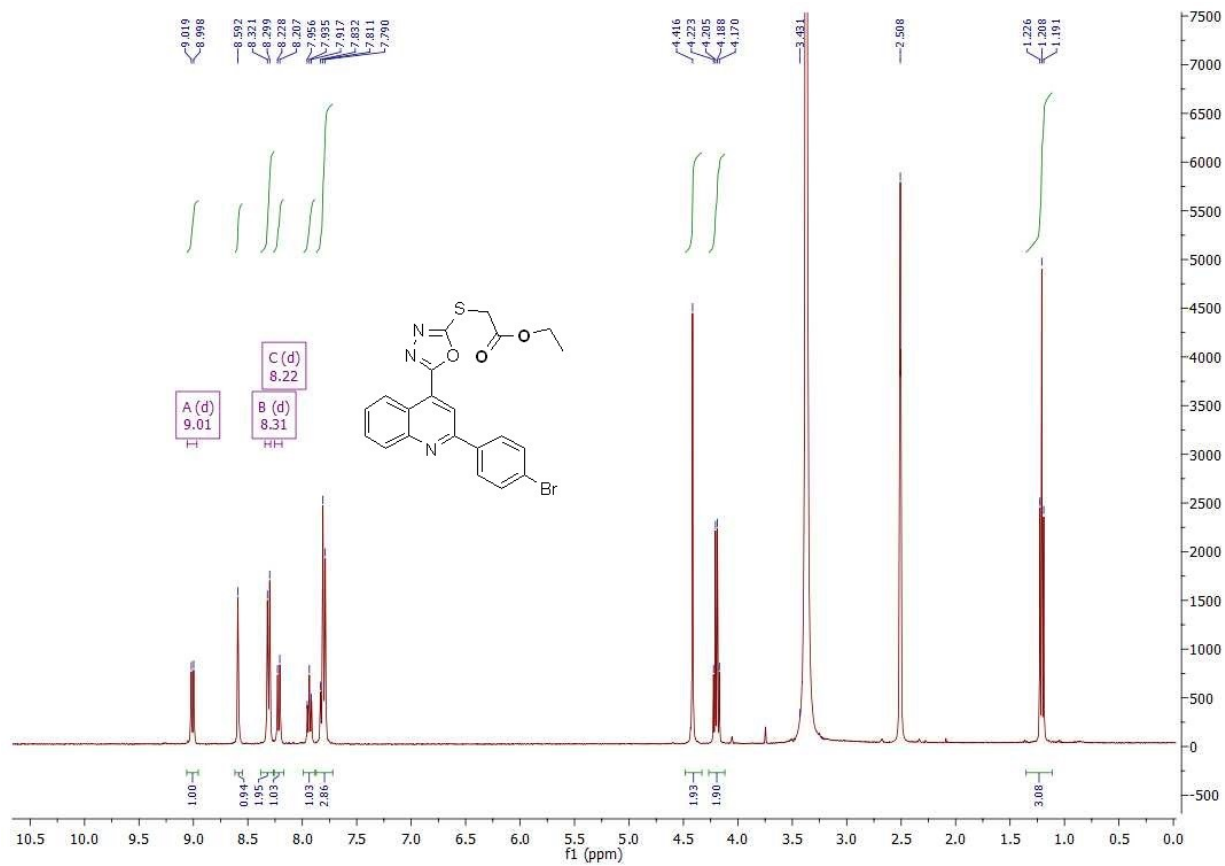

**Figure S51:** <sup>1</sup>H NMR spectrum of the compound 16.

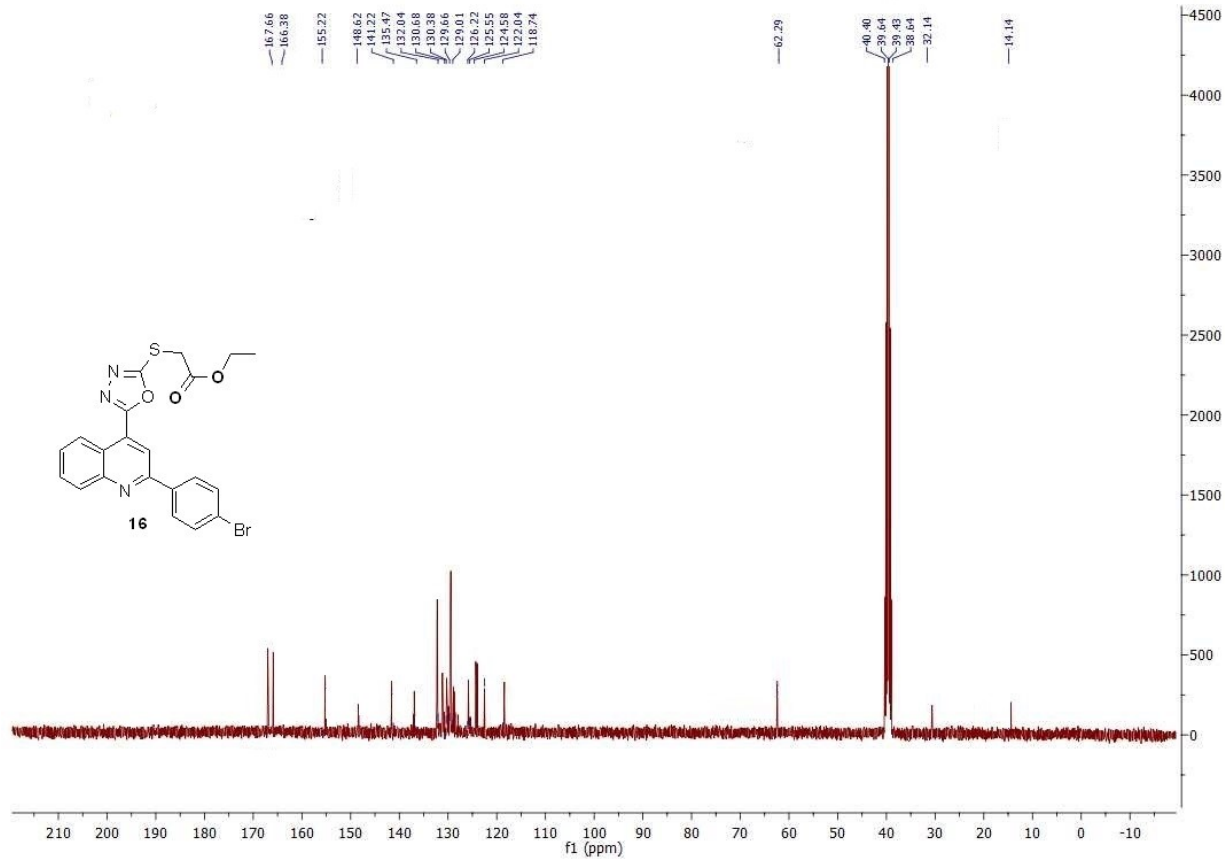

Figure S52:  $^{13}\text{C}$ NMR spectrum of the compound 16.

16 #71-72 RT: 1.21-1.22 AV: 2 SB: 26 1.21-1.34 , 0.87-1.14 NL: 1.62E2  
T: + cEI Full ms [40.00-1000.00]

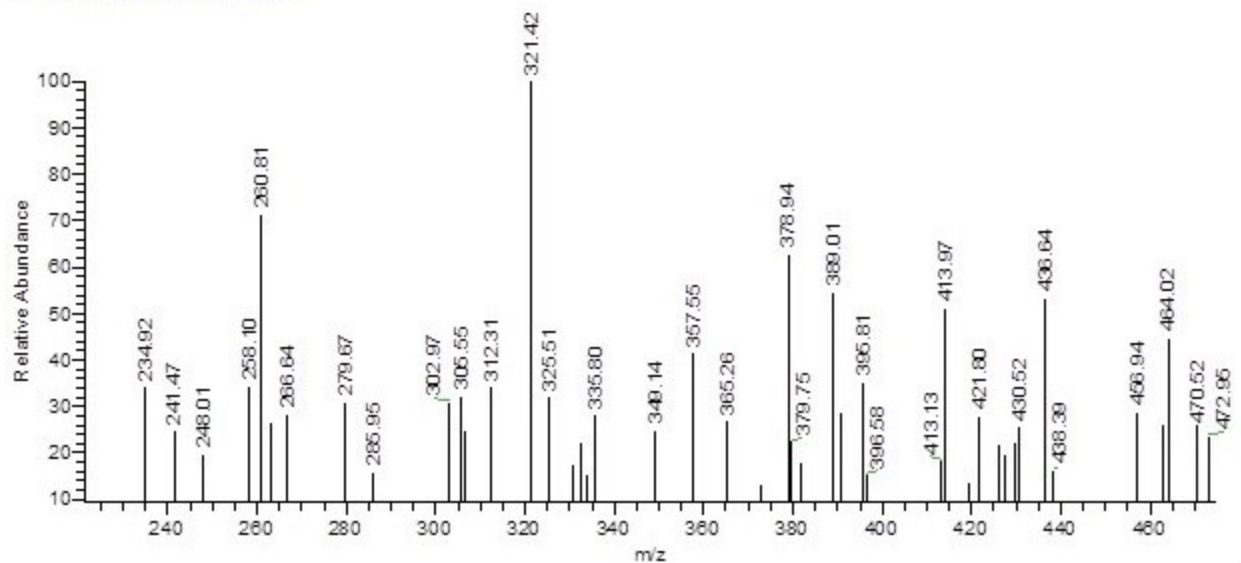

Figure S53: MS of the compound 16.

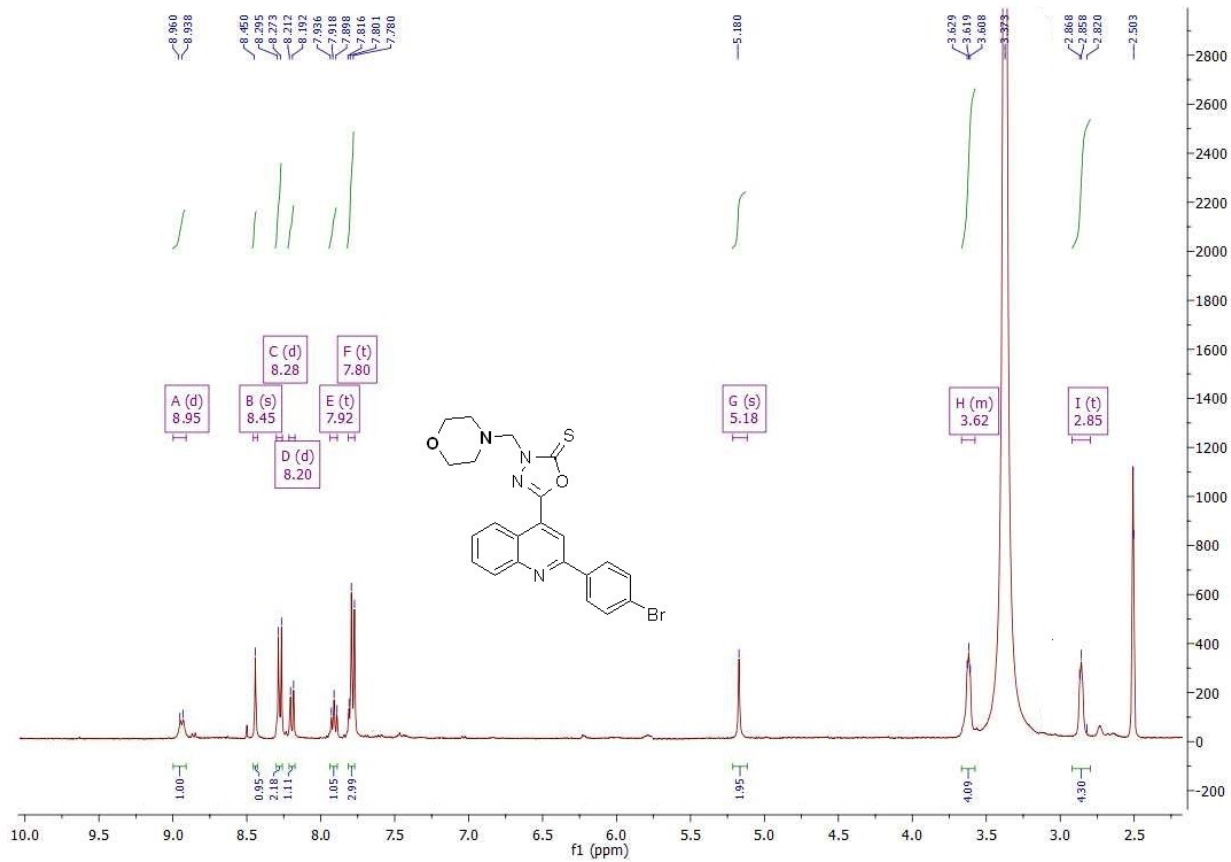

**Figure S54:**  $^1\text{H}$ NMR spectrum of the compound **17a**.

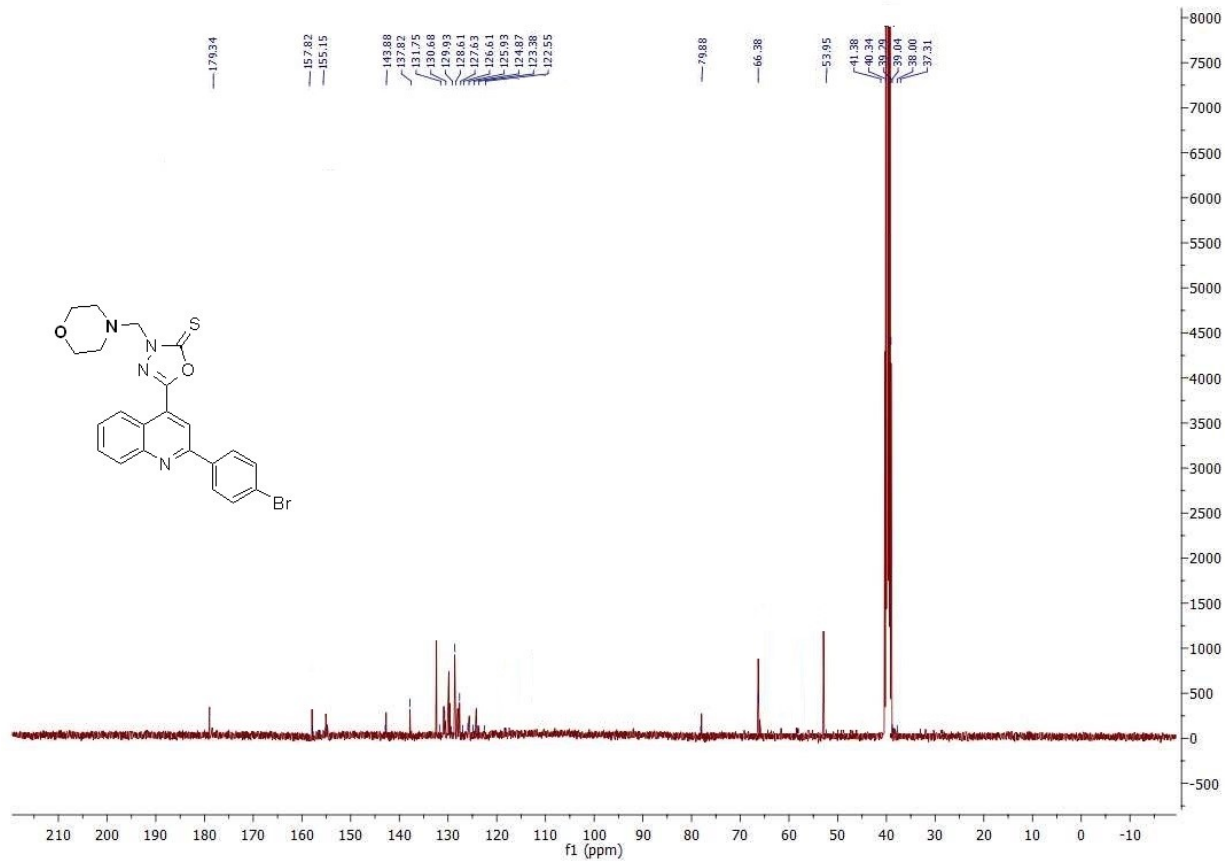

Figure S55:  $^{13}\text{C}$ NMR spectrum of the compound 17a.

17a #66-69 RT: 0.95-1.00 AV: 4 SB: 26 1.21-1.34 , 0.87-1.14 NL: 1.57E2  
T: + cEI Full ms [40.00-1000.00]

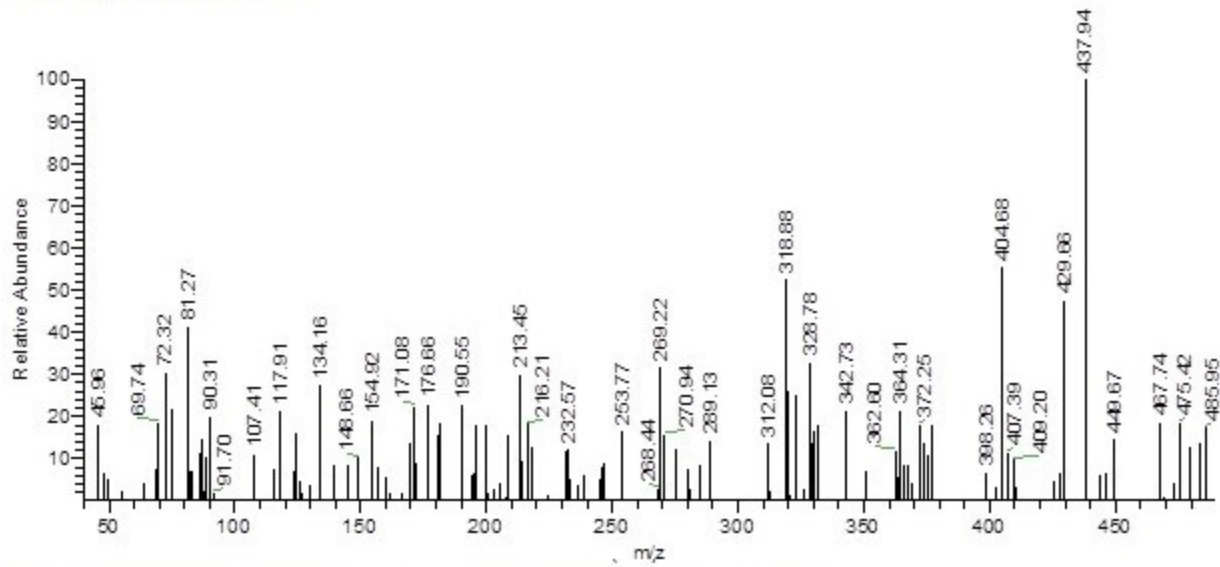

Figure S56: MS of the compound 17a.



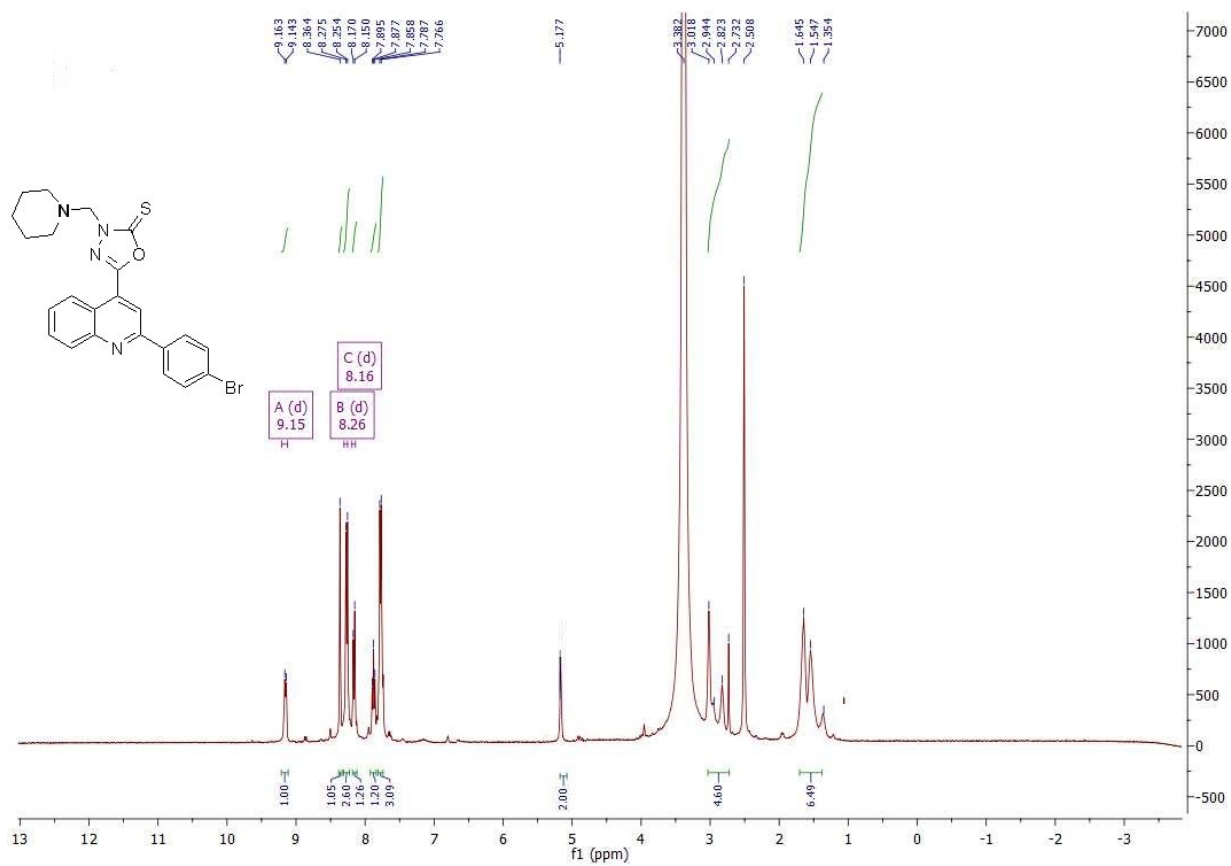

**Figure S57:**  $^1\text{H}$ NMR spectrum of the compound **17b**.

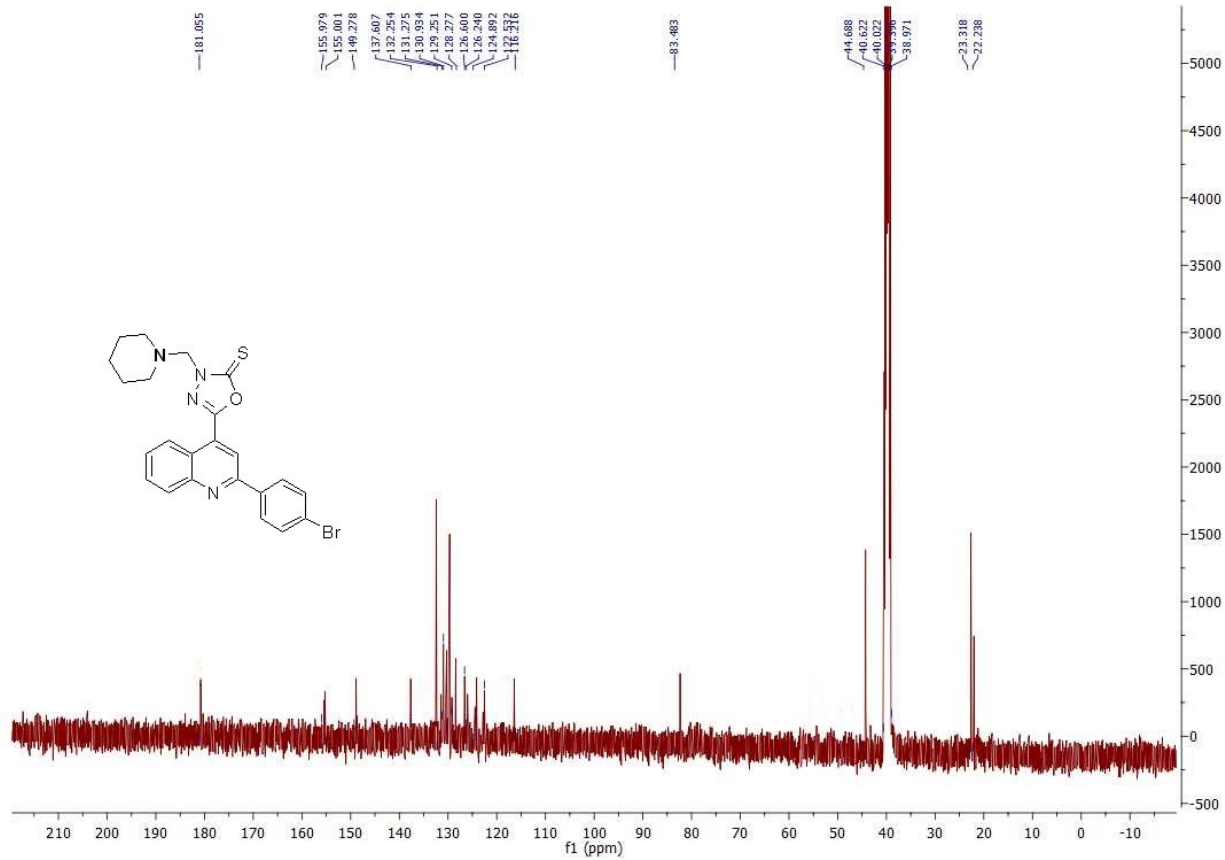

Figure S58: <sup>13</sup>CNMR spectrum of the compound 17b.

-17b #237-241 RT: 3.98-4.05 AV: 5 SB: 26 1.21-1.34, 0.87-1.14 NL: 1.78E2  
T: + cEI Full ms [40.00-1000.00]

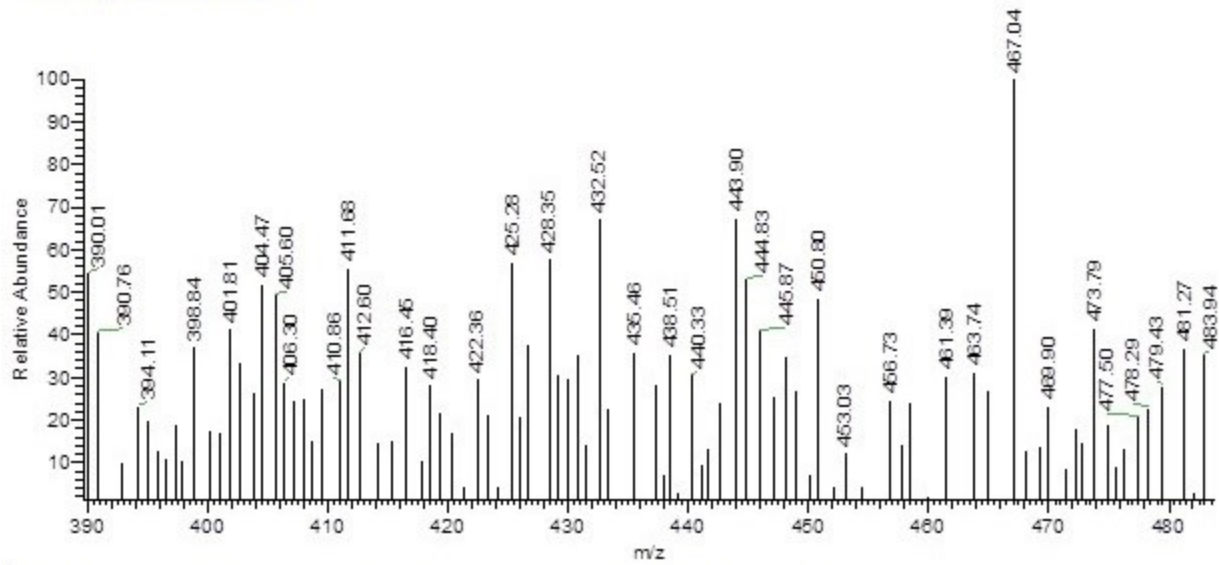

**Figure S59:** MS of the compound **17b**.

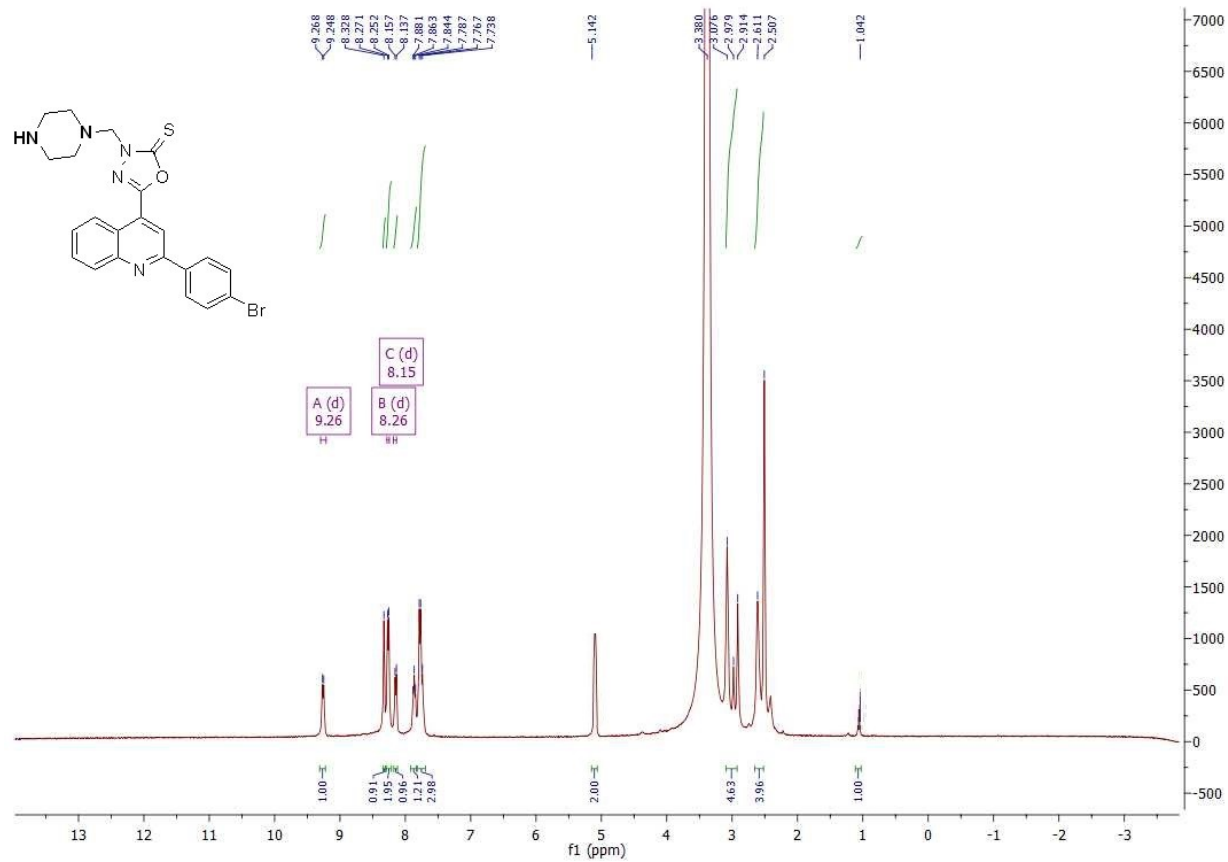

**Figure S60:** <sup>1</sup>H NMR spectrum of the compound **17c**.

-17c#222-225 RT: 3.73-3.78 AV: 4 SB: 26 1.21-1.34, 0.87-1.14 NL: 1.12E2  
T: + cEI Full ms [40.00-1000.00]

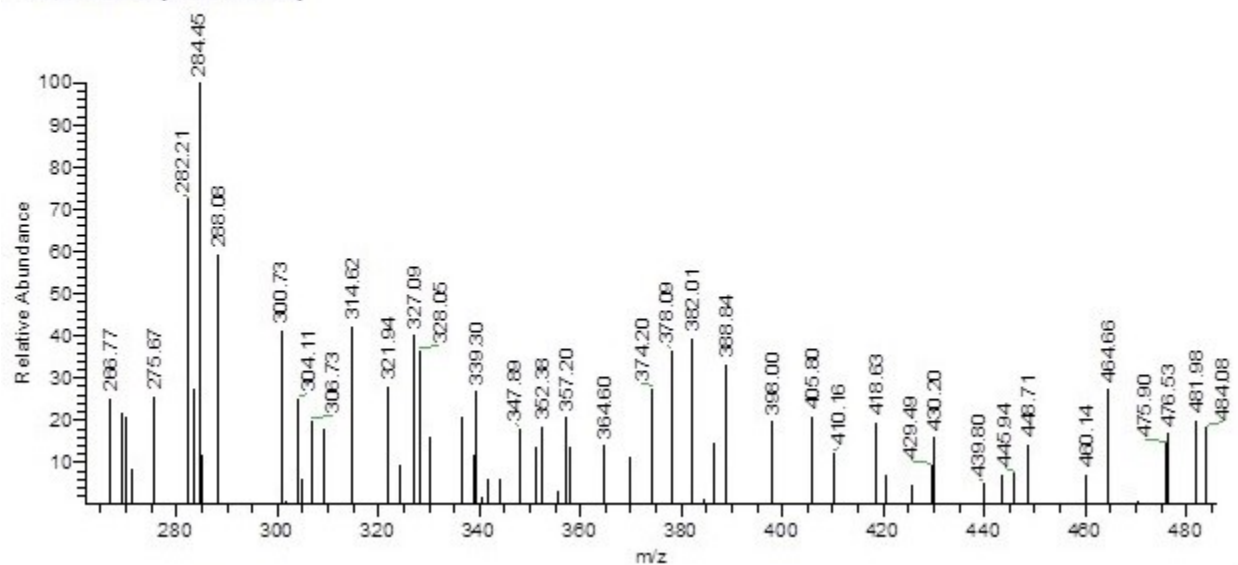

Figure S61: MS of the compound 17c.

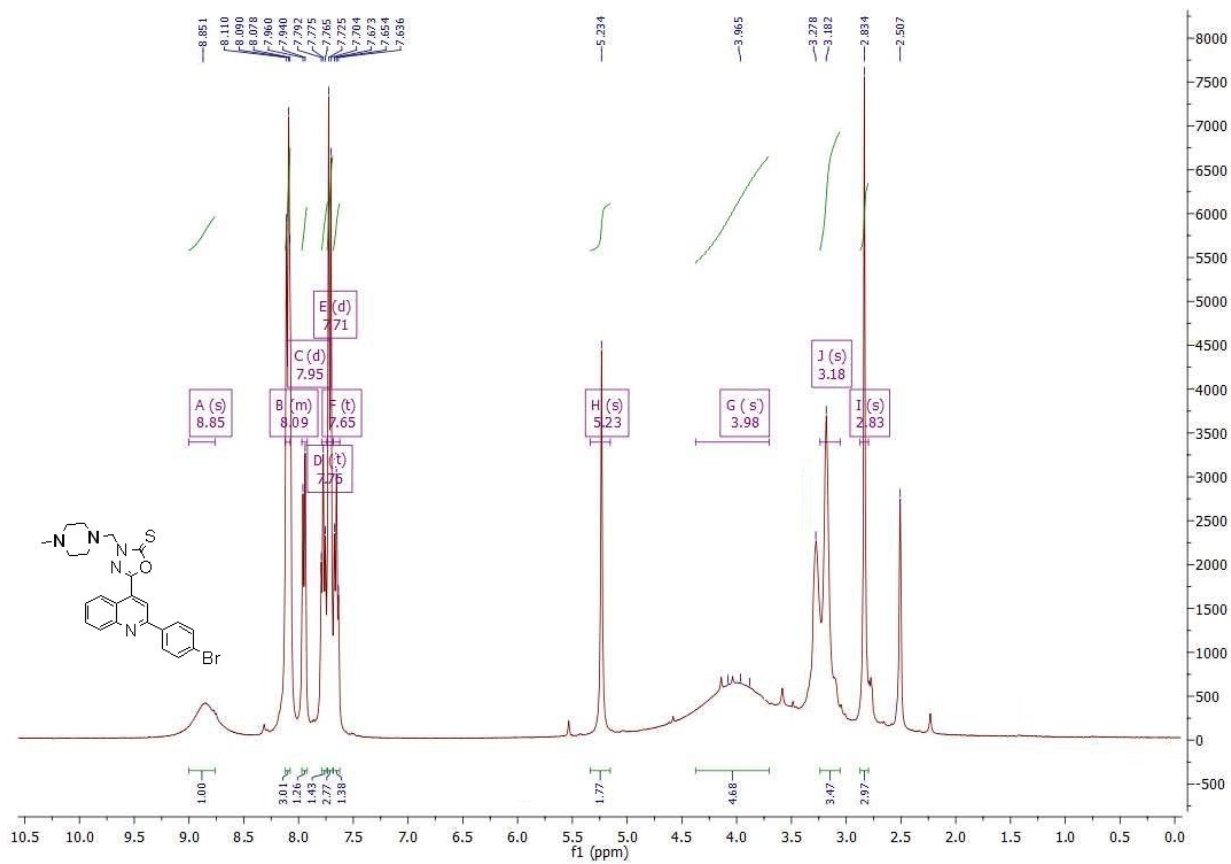

**Figure S62:**  $^1\text{H}$ NMR spectrum of the compound **17d**.

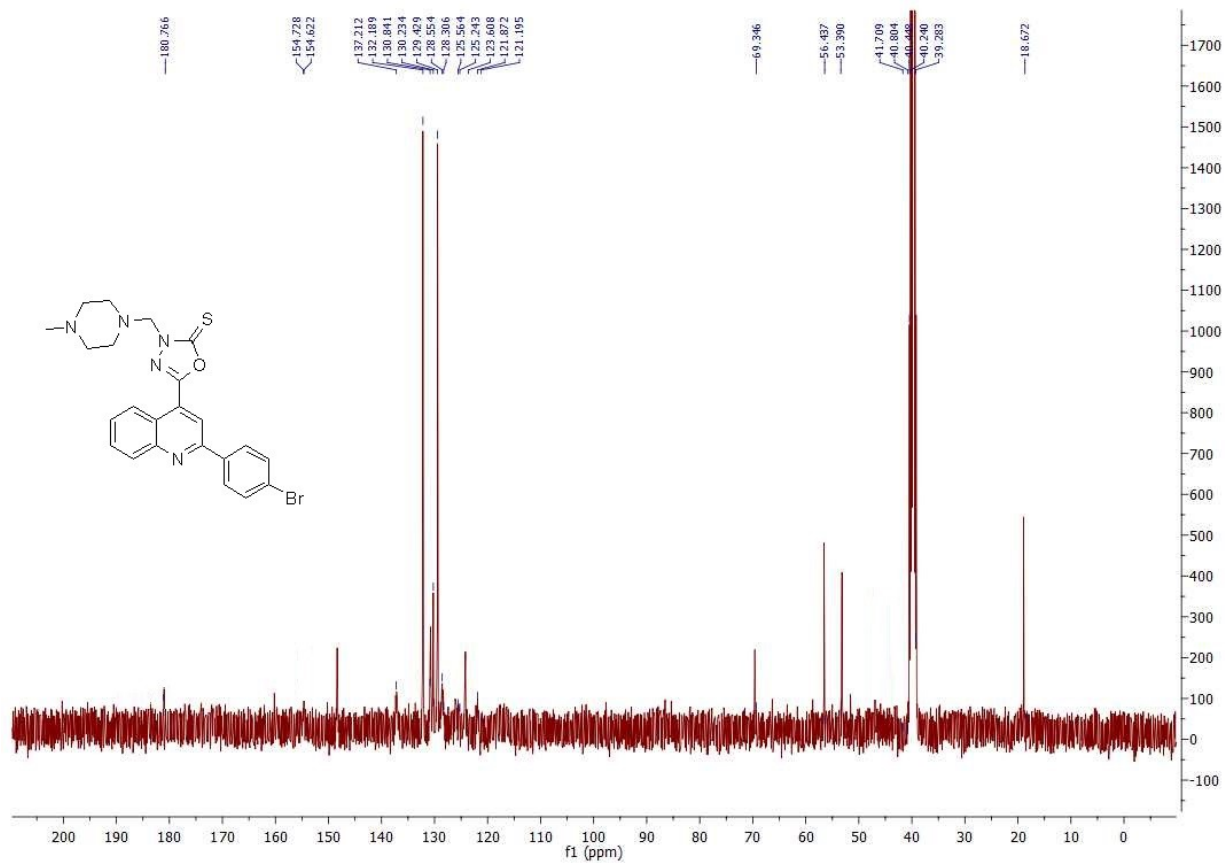

**Figure S63:** <sup>13</sup>CNMR spectrum of the compound 17d.

-17d #202-205 RT: 3.40-3.45 AV: 4 SB: 26 1.21-1.34, 0.87-1.14 NL: 1.59E2  
T: + cEI Full ms [40.00-1000.00]

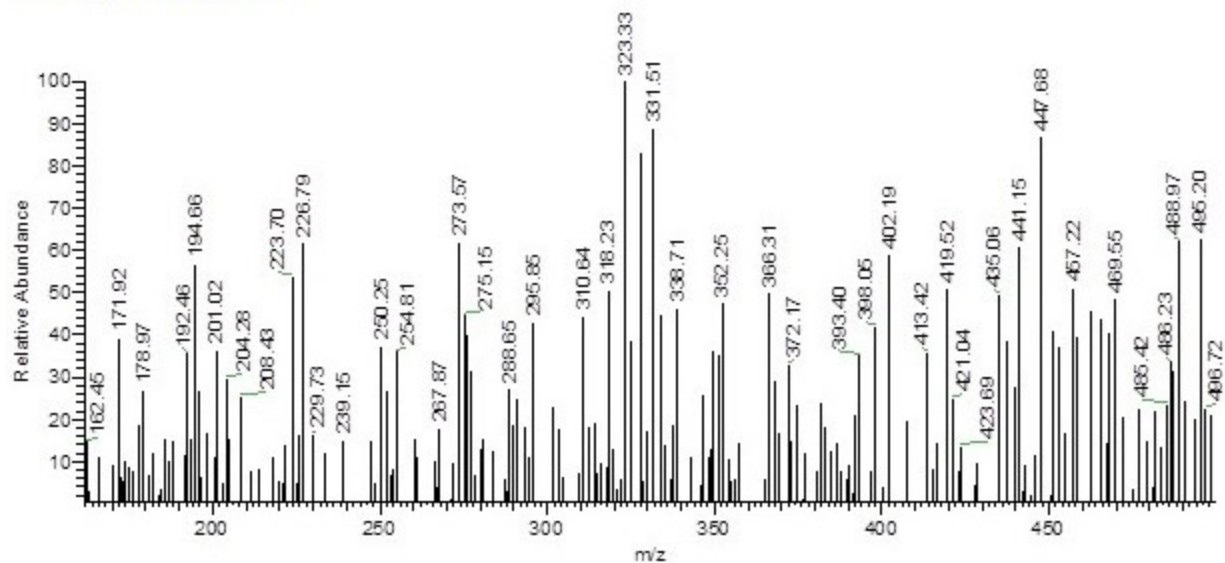

Figure S64: MS of the compound 17d.



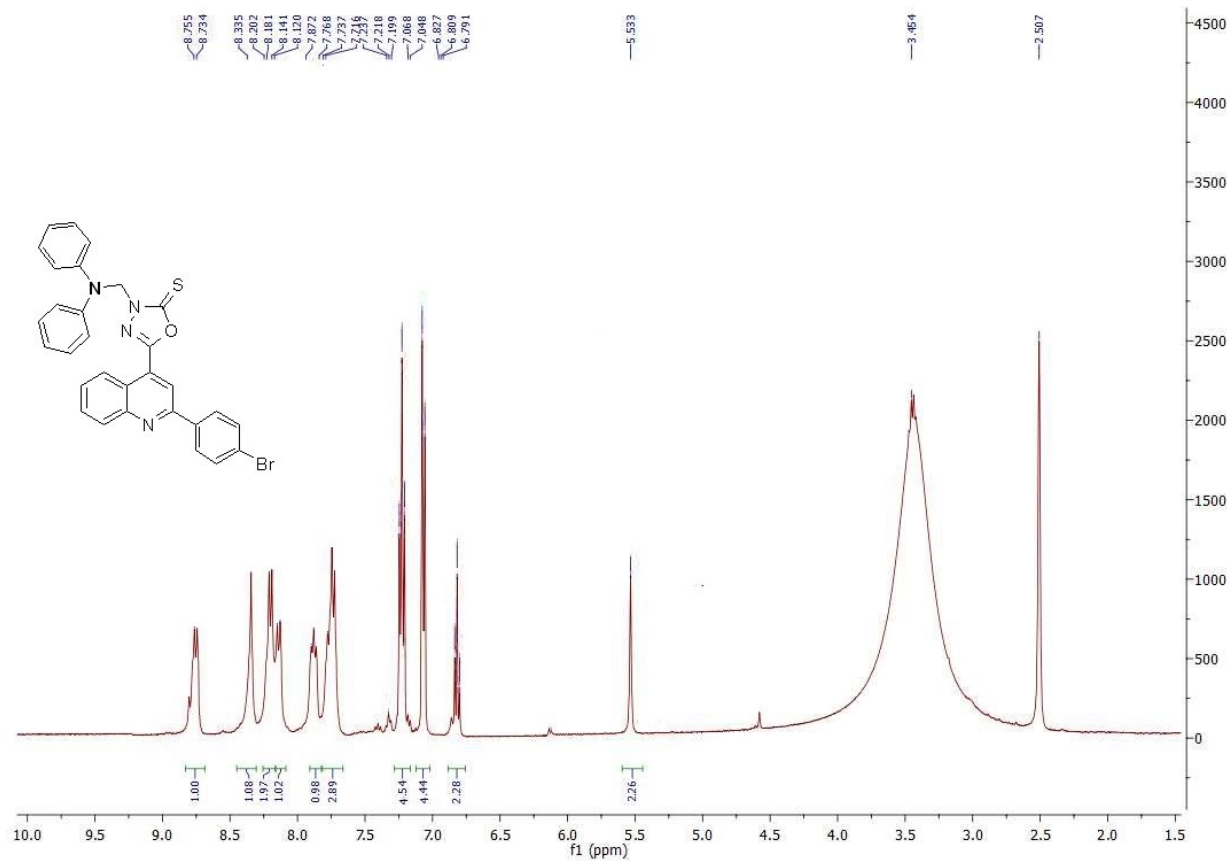

**Figure S65:** <sup>1</sup>H NMR spectrum of the compound 17e.

17e #172-177 RT: 2.90-2.98 AV: 6 SB: 26 1.21-1.34 , 0.87-1.14 NL: 1.08E2  
T: + cEI Full ms [40.00-1000.00]

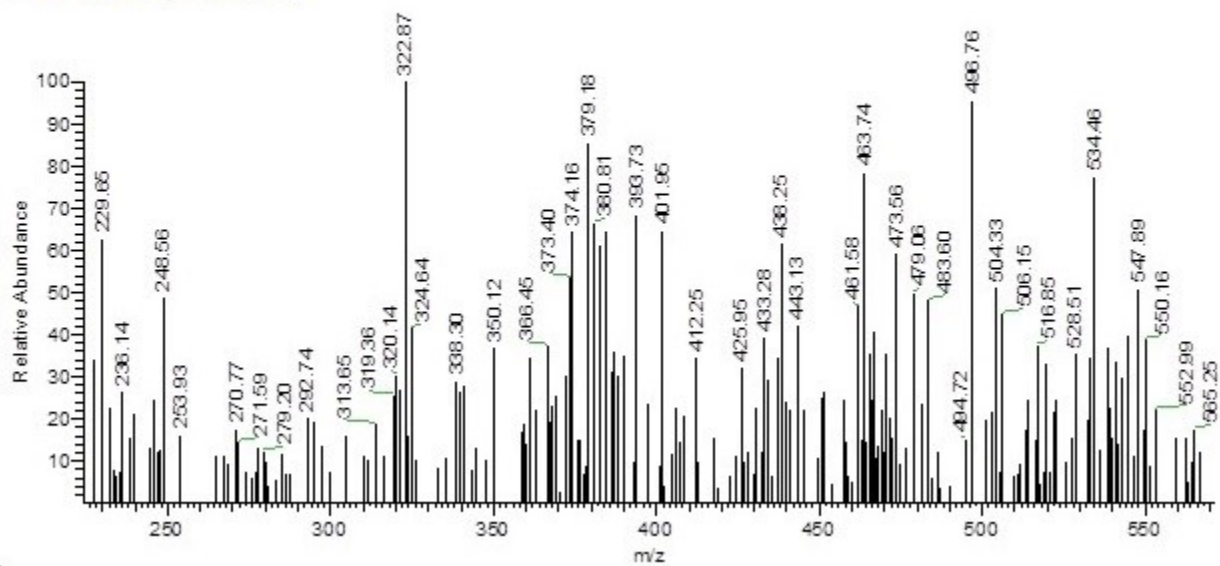

Figure S66: MS of the compound 17e.

## Appendix B

### **Part 2: Biological studies:**

#### **S4.1. Chemistry**

Solvents and reagents were obtained from Aldrich and were used without further purification unless otherwise indicated. Melting points were determined by open capillary tube method using Stuart SMP10 melting point apparatus and were uncorrected. The elemental analysis was carried out by Thermo Scientific™ FLASH 2000 CHNS/O analyzer, by thermo fisher scientific at The Regional Center for Mycology and Biotechnology, Al-Azhar University, Egypt. Infrared Spectra were recorded as potassium bromide discs on Bruker FT-IR spectrophotometer, MUST university and expressed in wave number  $\nu_{\max}$  ( $\text{cm}^{-1}$ ).  $^1\text{H}$ NMR spectra were performed on Bruker 400 MHz spectrophotometer using TMS as internal standard, chemical shifts( $\delta$ ) were recorded in ppm on  $\delta$  scale at Ain Shams University, Egypt.  $^{13}\text{C}$ NMR spectra were carried out using Bruker 100 MHz using TMS as internal standard, chemical shifts ( $\delta$ ) were recorded in ppm on  $\delta$  scale at at Ain Shams University, Egypt. Mass spectra were run on Hewlett Packard 5988 spectrometer or shimadzu QP-2010 plus at The Regional Center for Mycology & Biotechnology, Al-Azhar University, Egypt. Progress of the reactions was monitored by TLC using precoated aluminum sheets silica gel (Merck 60 F <sub>254</sub>) using chloroform:methanol (9.5:0.5) as the eluting system. and was visualized by UV lamp.

## S4.2. Biological Studies

### S4.2.1. Cytotoxic activity evaluation against two cancer cell lines

To measure the cytotoxic activity of the prepared quinoline-oxadiazole derivatives **7–17e** in hepatocellular carcinoma (HepG2) and breast adenocarcinoma (MCF-7) cell lines. Cell viability assay was assessed using MTT assay method. Cells at density of  $1 \times 10^4$  were seeded in a 96-well plate at 37 °C for 24 h under 5% CO<sub>2</sub>. After incubation, the cells were treated with different concentrations of the test hybrid **7–17e** and incubated for 24 h, then 20 µl of MTT solution at 5 mg/mL was applied and incubated for 4 h at 37 °C. Dimethyl sulphoxide (DMSO) in volume of 100 µl was added to each well to dissolve the purple formazan that had formed. The color intensity of the formazan product, which represents the growth condition of the cells, is quantified by using an ELISA plate reader (EXL 800, USA) at 570 nm absorbance. The experimental conditions were carried out with at least three replicates, and the experiments were repeated at least three times.

#### S4.2.1. Cell cycle analysis

Cell cycle analysis in HepG2 cells was investigated using fluorescent Annexin V-FITC/ PI detection kit (*BioVision* EZCell™ Cell Cycle Analysis Kit Catalog #K920) by flow cytometry assay. HepG2 cells at a density of  $2 \times 10^5$  per well were harvested and washed twice in PBS. After that, the cells were incubated at 37 °C and 5% CO<sub>2</sub>. The medium was incubated with the tested compounds **8c** and **12d** at the IC<sub>50</sub> (µM) for 48 h, washed twice in PBS, fixed with 70% ethanol, rinsed again with PBS. Afterward, medium was stained with DNA fluorochrome PI for 15 min at 37 °C. The samples were immediately analyzed using *Facs Calibur* flow cytometer (Becton and Dickinson, Heidelberg, Germany).

#### S4.2.4. Apoptosis assay for compound **6h**

Apoptosis in HepG2 cells was investigated using fluorescent Annexin V-FITC/ PI detection kit (*BioVision* Annexin V-FITC Apoptosis Detection Kit, Catalog #: K101) by flow cytometry assay. HepG2 cells at a density of  $2 \times 10^5$  per well were treated with tested compounds **8c** and **12d** at the IC<sub>50</sub> (µM) for 48 h, then the cells were harvested and stained with Annexin V-FITC/ PI dye for 15 min in the dark at 37 °C. The samples were immediately analyzed using *FACS Calibur* flow cytometer (Becton and Dickinson, Heidelberg, Germany).

### S4.2.2. EGFR kinase Assay

Compounds **8c**, **12d** and Lapatinib were evaluated for their EGFR kinase inhibitory activity according to manufacturer's instructions using # BPS Bioscience *EGFR Kinase Assay Kit* Catalog # 40321.

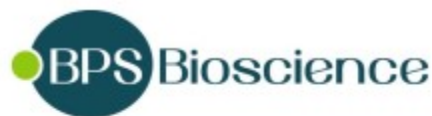

6042 Cornerstone Court W, Ste B  
San Diego, CA 92121  
Tel: 1.858.829.3082  
Fax: 1.858.481.8694  
Email: info@bpsbioscience.com

### Data Sheet **EGFR Kinase Assay Kit** Catalog # 40321

**DESCRIPTION:** The epidermal growth factor receptor (EGFR; ErbB-1; HER1) is the cell-surface receptor for members of the epidermal growth factor family. Overexpression and/or hyperactivation of EGFR kinase is associated with several human cancers such as lung, glioblastoma, and epithelial tumors of the neck and head, leading to the development of anticancer therapeutics targeting EGFR. The *EGFR Kinase Assay Kit* is designed to measure EGFR Kinase activity for screening and profiling applications using Kinase-Glo<sup>®</sup> MAX as a detection reagent. The EGFR Kinase Assay Kit comes in a convenient 96-well format, with enough purified recombinant EGFR enzyme, EGFR substrate, ATP and kinase assay buffer for 100 enzyme reactions.

#### COMPONENTS:

| Catalog # | Reagent                             | Amount | Storage    |                                           |
|-----------|-------------------------------------|--------|------------|-------------------------------------------|
| 40187     | EGFR (wild type)                    | 2 µg   | -80°C      | <b>Avoid multiple freeze/thaw cycles!</b> |
|           | 5x Kinase assay buffer              | 1.5 ml | -20°C      |                                           |
|           | ATP (500 µM)                        | 100 µl | -20°C      |                                           |
| 40217     | 50x PTK substrate Poly(Glu:Tyr 4:1) | 100 µl | -20°C      |                                           |
|           | 96-well plate, white                | 1      | Room Temp. |                                           |

#### MATERIALS OR INSTRUMENTS REQUIRED BUT NOT SUPPLIED:

Kinase-Glo MAX (Promega #V6071)  
Dithiothreitol (DTT, 1 M; optional)  
Microplate reader capable of reading luminescence  
Adjustable micropipettor and sterile tips  
30°C incubator

**APPLICATIONS:** Useful for studying enzyme kinetics and screening small molecular inhibitors for drug discovery and HTS applications.

**STABILITY:** Up to 6 months when stored as recommended.

#### REFERENCE:

Nakamura, J.L. *Expert Opin. Ther. Targets* **11(4)**:463-472 (2007)

### S2.2.6. *In vitro* antimicrobial activity

10 mg from each compound was dissolved in 2 mL of DMSO and 100µl from each compound was tested with a final dose of 500µg for each treatment. Nutrient agar plates were heavily inoculated regularly with 0.1ml of 10<sup>5</sup>-10<sup>6</sup> cells/ml in case of bacteria and yeast. Czapek-Dox agar plates seeded by 0.1ml (10<sup>6</sup> cells/ml) the fungal inoculum was used to evaluate the antifungal activities. Three holes were initiated in each inoculated plate. 100 microleter from

each sample were dispensed in each cup. Then plates were kept at low temperature (4°C) for 2-4 hours to allow maximum diffusion. The plates were then incubated at 37°C for 24 hours for bacteria and at 30°C for 48 hours in upright position to allow maximum growth of the organisms. The antimicrobial activity of the test agent was determined by measuring the diameter of zone of inhibition expressed in millimeter (mm). The experiment was carried out more than once and mean of reading was recorded.

#### **S4.2.7. MIC and MBC methodology**

##### **S4.2.7.1. Preparation of bacterial culture**

Bacterial cultures were prepared under sterile conditions by incubating 100 ml bottle with each test microbe, capped and incubated at 35 °C for 24 h. Clean bacterial cells were prepared by centrifuging the growth culture, under sterile condition, in cooling centrifuge at 400 rpm for 15 min. The bacterial cells were re-suspended using 20 mL of sterile normal saline and centrifuged again at 4000 rpm for 5 min. This step was repeated until the supernatant was clear. The pellet was then suspended in 20 mL of sterile normal saline. The optical density of the bacterial suspension was recorded at 500 nm, and serial dilutions were carried out with appropriate aseptic techniques until the optical density was in the range of 0.5–1.0. The actual number of colony-forming units was carried out to obtain a concentration of  $5 \times 10^6$  cfu/mL.

##### **S4.2.7.2. Preparation of resazurin solution**

The resazurin solution was prepared by dissolving a 675 mg in 100 mL of sterile distilled water and shake well with vortex mixer and sterilized by filtration through membrane filter (pore size of (0.22- 0.45  $\mu$ m).

##### **S4.2.7.3. Preparation of the plates**

Microplates, 96 well were prepared and labelled under aseptic conditions. A volume of 500  $\mu$ L of test material in DMSO (a stock concentration of 5mg/mL for purified compounds) was pipetted into the first row of the plate. To all other wells 50  $\mu$ L of broth medium was added. Serial dilutions were performed. To each well 10 $\mu$ L of resazurin indicator solution was added, 10 $\mu$ L of bacterial suspension ( $5 \times 10^6$ cfu/mL) was added to each well. Each plate was wrapped loosely with parafilm to ensure that bacteria did not become dehydrated. The plates were

prepared in duplicate and placed in an incubator set at 37°C for 18–24 h. The colour change was then assessed visually. Any colour changes from purple to pink or colourless were recorded as positive. The lowest concentration at which colour change occurred was taken as the MIC value.

#### **S4.2.7.4. Determination of minimum bactericidal concentrations (MBC's) of the effective plants extract**

Streaks were taken from the two lowest concentrations of the plant extract plates exhibiting invisible growth (from inhibition zone of MIC plates) and subcultures onto sterile nutrient agar plates. The plates were incubated at 35°C for 24 h. then examined for bacterial growth in corresponding to plant extract concentration. MBC was taken as the concentration of plant extract that did not exhibiting any bacterial growth on the freshly inoculated agar plates.[1]

#### **S4.2.8. Minimum biofilm inhibitory concentration (MBIC) assay**

Inhibin of biofilm formation has been evaluated using 96-well microplates assay method.[2] In each well 200 µl of LB (Lauria broth) has been added. To the first well, 100 µl of the tested compound was added and two-fold dilution has been performed leaving the last two wells as control. To each well, 10 µl of the previously prepared microbial culture (0.5 McFarland standard,  $5 \times 10^5$  CFU/ml) were added. After incubating the plates at 37 °C for 24 h, the culture was gently decanted and then washed by phosphate buffered saline (PBS) buffer. The plates were left to dry for 30 min and 200 µl of crystal violet 0.1% was added to each well and left for 30 min. the excess crystal violet was decanted and washed-out three times with distilled water and left to dry for 30 min. Finally, 200 µl of 95% ethanol was added to each well and the absorbance was measured at 492 nm using ELISA reader.
